# Supplementary material for: Swelling Pressure of Double‐Expansive Material and Its Active Support Effect for Coal Seam Gas Drainage Borehole
Source: Hindawi journal article supplement (doi:10.1155/2018/8245036), 2018-01-01
Supplement: f1 [file 8245036.f1.zip]

Archive with 11 entries (11 files):
- 1 Free swelling test data of the DE material.xls
- EDS data for AFt.xls
- EDS data for CH.xls
- Field tests data.xls
- Micrograph at the 168th hour after the starting hydration.jpg
- Micrograph at the 16th hour after the starting hydration.jpg
- RSPI calculation results.xls
- Test No.1 data.xls
- Test No.2 data.xls
- Test No.3 data.xls
- Test No.4 data.xls
