# Supplementary material for: Swelling Pressure of Double‐Expansive Material and Its Active Support Effect for Coal Seam Gas Drainage Borehole
Source: Hindawi journal article supplement (doi:10.1155/2018/8245036), 2018-01-01
Supplement: f1 [file 8245036.f1.zip › 1 Free swelling test data of the DE material.xls]

## Sheet: Sheet1
TIME / HOUR	FREE SWELLING RATIO / %
0	0
16	9.7
48	12.5
120	14.6
168	15.4
240	15.5
