# Supplementary material for: Swelling Pressure of Double‐Expansive Material and Its Active Support Effect for Coal Seam Gas Drainage Borehole
Source: Hindawi journal article supplement (doi:10.1155/2018/8245036), 2018-01-01
Supplement: f1 [file 8245036.f1.zip › EDS data for AFt.xls]

## Sheet: Sheet1
0.00132	168.803
0.00382	144.196
0.00632	116.809
0.00882	98.7618
0.01132	85.4947
0.01382	72.8947
0.01632	63.3706
0.01882	50.8077
0.02132	43.1365
0.02382	37.0218
0.02632	26.5712
0.02882	23.4212
0.03131	15.9353
0.03381	11.7847
0.03631	9.15353
0.03881	5.63294
0.04131	4.63235
0.04381	3.22412
0.04631	2.00118
0.04881	1.55647
0.05131	0.77824
0.05381	0.66706
0.05631	0.40765
0.05881	0.22235
0.06131	0.14822
0.0638	0.03706
0.0663	0
0.0688	0
0.0713	0
0.0738	0
0.0763	0
0.0788	0
0.0813	0
0.0838	0
0.0863	0
0.0888	0
0.0913	0
0.09379	0
0.09629	0
0.09879	0
0.10129	0
0.10379	0
0.10629	0
0.10879	0
0.11129	0
0.11379	0
0.11629	0
0.11879	0
0.12129	1.46113
0.12379	3.83538
0.12628	14.0258
0.12878	20.3151
0.13128	22.0962
0.13378	22.6933
0.13628	22.4377
0.13878	21.5238
0.14128	20.6256
0.14378	19.732
0.14628	18.7964
0.14878	17.6449
0.15128	15.7212
0.15378	13.9224
0.15627	12.0328
0.15877	10.7311
0.16127	9.75039
0.16377	8.05734
0.16627	6.8008
0.16877	5.77906
0.17127	4.70946
0.17377	3.64549
0.17627	3.03779
0.17877	2.66768
0.18127	2.25759
0.18377	1.79714
0.18627	1.40816
0.18876	1.17588
0.19126	0.96799
0.19376	0.82733
0.19626	0.64708
0.19876	0.44372
0.20126	0.34566
0.20376	0.25316
0.20626	0.19192
0.20876	0.21298
0.21126	0.15061
0.21376	0.11023
0.21626	0.07052
0.21875	0.04223
0.22125	0.06461
0.22375	0.04173
0.22625	0.09407
0.22875	0.12178
0.23125	0.07875
0.23375	0.09517
0.23625	0.0938
0.23875	0.05864
0.24125	0.05707
0.24375	0.01854
0.24625	0.01947
0.24875	0.03005
0.25124	0.01314
0.25374	0.12536
0.25624	0.05162
0.25874	0.1256
0.26124	0.14293
0.26374	0.19201
0.26624	0.14549
0.26874	0.13336
0.27124	0.20698
0.27374	0.18959
0.27624	0.28265
0.27874	0.15652
0.28123	0.17267
0.28373	0.16951
0.28623	0.16017
0.28873	0.10787
0.29123	0.15943
0.29373	0.15197
0.29623	0.18454
0.29873	0.19311
0.30123	0.11164
0.30373	0.13471
0.30623	0.07539
0.30873	0.04681
0.31123	0.06559
0.31372	0.0877
0.31622	0.05244
0.31872	0.04444
0.32122	0.00621
0.32372	0
0.32622	0.00109
0.32872	0.02015
0.33122	0.000733706
0.33372	0.06646
0.33622	0.06597
0.33872	0.11794
0.34122	0.1122
0.34371	0.02126
0.34621	0.04586
0.34871	0.03483
0.35121	0.00476
0.35371	0
0.35621	0
0.35871	0.01065
0.36121	0
0.36371	0
0.36621	0.02683
0.36871	0.04054
0.37121	0.00279
0.37371	0.01911
0.3762	0.0395
0.3787	0.03757
0.3812	0.00955
0.3837	0.09083
0.3862	0.12564
0.3887	0.09025
0.3912	0.08804
0.3937	0.0732
0.3962	0.03481
0.3987	0.04813
0.4012	0.02897
0.4037	0
0.40619	0
0.40869	0.0086
0.41119	0.01894
0.41369	0.01106
0.41619	0
0.41869	0.01493
0.42119	0.05681
0.42369	0.0446
0.42619	0.03169
0.42869	0.00807
0.43119	0.00107
0.43369	0.00859
0.43619	0
0.43868	0
0.44118	0
0.44368	0
0.44618	0.03401
0.44868	0.06744
0.45118	0.05037
0.45368	0.0264
0.45618	0.02878
0.45868	0
0.46118	0
0.46368	0.04119
0.46618	0.05304
0.46867	0.07443
0.47117	0.04499
0.47367	0.06604
0.47617	0.01618
0.47867	0.02942
0.48117	0.00821
0.48367	0.000192353
0.48617	7.84118e-05
0.48867	0.02877
0.49117	0.00848
0.49367	0.05722
0.49617	0.07419
0.49867	0.04587
0.50116	0.00907
0.50366	0.02794
0.50616	0.03718
0.50866	0.03703
0.51116	0.00909
0.51366	0.05722
0.51616	0.07419
0.51866	0.04587
0.52116	0.00907
0.52366	0.02794
0.52616	0.03718
0.52866	0.03703
0.53115	0.05722
0.53365	0.07419
0.53615	0.04587
0.53865	0.00907
0.54115	0.02794
0.54365	0.03718
0.54615	0.03703
0.54865	0.05722
0.55115	0.07419
0.55365	0.04587
0.55615	0.00907
0.55865	0.02794
0.56115	0.03718
0.56364	0.03703
0.56614	0
0.56864	0.0954
0.57114	0.00758
0.57364	0
0.57614	0.07417
0.57864	0.06576
0.58114	0
0.58364	0.08757
0.58614	0
0.58864	0
0.59114	0
0.59363	0
0.59613	0
0.59863	0
0.60113	0
0.60363	0.09266
0.60613	0.05444
0.60863	0.01033
0.61113	0.02167
0.61363	0.09835
0.61613	0.0537
0.61863	0.04783
0.62113	0
0.62363	0
0.62612	0.05884
0.62862	0.01204
0.63112	0.00243
0.63362	0
0.63612	0.000856118
0.63862	0.05635
0.64112	0
0.64362	0.0093
0.64612	0.01077
0.64862	0
0.65112	0
0.65362	0.00462
0.65611	0
0.65861	0.08088
0.66111	0.05147
0.66361	0.06579
0.66611	0.04316
0.66861	0.04449
0.67111	0.01294
0.67361	0.14265
0.67611	0.03984
0.67861	0.000307176
0.68111	0.01226
0.68361	0.05043
0.68611	0
0.6886	0.05215
0.6911	0.05016
0.6936	0.05566
0.6961	0.02843
0.6986	0.03339
0.7011	0.02057
0.7036	0.043
0.7061	0.00719
0.7086	0.01103
0.7111	0.01252
0.7136	0
0.7161	0
0.71859	0
0.72109	0
0.72359	0.01707
0.72609	0
0.72859	0.02226
0.73109	0.04775
0.73359	0.1141
0.73609	0.02056
0.73859	0.04299
0.74109	0.02033
0.74359	0.14054
0.74609	0
0.74859	0
0.75108	0
0.75358	0.04853
0.75608	0
0.75858	0.08082
0.76108	0
0.76358	0.08915
0.76608	0.00248
0.76858	0.0133
0.77108	0.0404
0.77358	0.08887
0.77608	0.03146
0.77858	0.08154
0.78107	0.02755
0.78357	0
0.78607	0
0.78857	0.01147
0.79107	0
0.79357	0.03756
0.79607	0.03754
0.79857	0.03903
0.80107	0.06523
0.80357	0.03562
0.80607	0.05581
0.80857	0.08601
0.81107	0.0056
0.81356	0
0.81606	0.02546
0.81856	0.11459
0.82106	0.07635
0.82356	0.06781
0.82606	0
0.82856	0.03244
0.83106	0.00793
0.83356	0.08311
0.83606	0.03351
0.83856	0.00216
0.84106	0.07686
0.84355	0.03292
0.84605	0
0.84855	0.06918
0.85105	0
0.85355	0.03509
0.85605	0
0.85855	0
0.86105	0
0.86355	0.03765
0.86605	0
0.86855	0.03975
0.87105	0.04462
0.87355	0.07235
0.87604	0.03876
0.87854	0.04333
0.88104	0.22555
0.88354	0.07601
0.88604	0
0.88854	0.05595
0.89104	0.04698
0.89354	0.03022
0.89604	0.0523
0.89854	0.02588
0.90104	0.02317
0.90354	0.0388
0.90603	0.03936
0.90853	0.03368
0.91103	0.05011
0.91353	0.05328
0.91603	0.06096
0.91853	0.02621
0.92103	0.10293
0.92353	0.1077
0.92603	0.06877
0.92853	0.1469
0.93103	0.12142
0.93353	0.16676
0.93603	0.17137
0.93852	0.15595
0.94102	0.29226
0.94352	0.4035
0.94602	0.38529
0.94852	0.31709
0.95102	0.51066
0.95352	0.38808
0.95602	0.3566
0.95852	0.40848
0.96102	0.39466
0.96352	0.30387
0.96602	0.35251
0.96851	0.20956
0.97101	0.32587
0.97351	0.11636
0.97601	0.44627
0.97851	0.37606
0.98101	0.26308
0.98351	0.32164
0.98601	0.21766
0.98851	0.24198
0.99101	0.35093
0.99351	0.32982
0.99601	0.2415
0.99851	0.28688
1.001	0.12397
1.0035	0.03226
1.006	0.02114
1.0085	0.02847
1.011	0.06719
1.0135	0.04631
1.016	0.08954
1.0185	0.11466
1.021	0.07598
1.0235	0.11951
1.026	0.00749
1.0285	0.02761
1.03099	0.1044
1.03349	0.13367
1.03599	0.1798
1.03849	0.02364
1.04099	0.000744882
1.04349	0.10654
1.04599	0.11843
1.04849	0.00541
1.05099	0.0443
1.05349	0.11572
1.05599	0.07244
1.05849	0.07665
1.06099	0.03179
1.06348	0.04368
1.06598	0.10127
1.06848	0.07536
1.07098	0.0306
1.07348	0.07542
1.07598	0.07829
1.07848	0.07132
1.08098	0.06798
1.08348	0.06743
1.08598	0.10691
1.08848	0.07032
1.09098	0.07373
1.09347	0.10041
1.09597	0.00465
1.09847	0.08116
1.10097	0.07877
1.10347	-8.43529e-05
1.10597	0.0453
1.10847	0.07272
1.11097	0.0414
1.11347	0.0361
1.11597	-0.0147
1.11847	0.03358
1.12097	0.08309
1.12347	0.11476
1.12596	0.06736
1.12846	-0.00212
1.13096	0.00323
1.13346	0.0868
1.13596	0.07711
1.13846	0.10595
1.14096	0.02035
1.14346	-0.000512059
1.14596	0.18078
1.14846	0.04559
1.15096	0.12824
1.15346	-0.00443
1.15595	-0.00665
1.15845	0.08044
1.16095	0.05069
1.16345	0.07692
1.16595	0.07376
1.16845	0.03658
1.17095	0.05245
1.17345	0.18625
1.17595	0.07166
1.17845	0.0644
1.18095	0.03879
1.18345	0.03743
1.18595	0.07992
1.18844	0.11609
1.19094	0.10298
1.19344	0.0816
1.19594	0.17952
1.19844	0.06103
1.20094	-0.00118
1.20344	0.08352
1.20594	0.21149
1.20844	0.10468
1.21094	0.10864
1.21344	0.06361
1.21594	0.00961
1.21843	0.09071
1.22093	0.14638
1.22343	0.10452
1.22593	0.07237
1.22843	0.11712
1.23093	0.13867
1.23343	0.08309
1.23593	0.17833
1.23843	0.09916
1.24093	0.04574
1.24343	0.07191
1.24593	0.05436
1.24843	0.14246
1.25092	0.24286
1.25342	0.13856
1.25592	0.10391
1.25842	0.06959
1.26092	0.08836
1.26342	0.15734
1.26592	0.18178
1.26842	0.05532
1.27092	0.17417
1.27342	0.12108
1.27592	0.15722
1.27842	0.1706
1.28091	0.09395
1.28341	0.15073
1.28591	0.04245
1.28841	0.2033
1.29091	0.20673
1.29341	0.06931
1.29591	0.21673
1.29841	0.18736
1.30091	0.11121
1.30341	0.12252
1.30591	0.17741
1.30841	0.14266
1.31091	0.11746
1.3134	0.13108
1.3159	0.1642
1.3184	0.09001
1.3209	0.12532
1.3234	0.13956
1.3259	0.09028
1.3284	0.0375
1.3309	0.06806
1.3334	0.07517
1.3359	0.15442
1.3384	0.04808
1.3409	0.04197
1.34339	0.0732
1.34589	0.06652
1.34839	0.04978
1.35089	0.08926
1.35339	0.12633
1.35589	0.07285
1.35839	0.11602
1.36089	0.13788
1.36339	0.04601
1.36589	0.13511
1.36839	0.10879
1.37089	0.11048
1.37339	0.09287
1.37588	0.07195
1.37838	0.11017
1.38088	0.0749
1.38338	0.16055
1.38588	0.10626
1.38838	0.06494
1.39088	0.0604
1.39338	0.13169
1.39588	0.1715
1.39838	0.15109
1.40088	0.15233
1.40338	0.13526
1.40587	0.08772
1.40837	0.06343
1.41087	0.10899
1.41337	0.14561
1.41587	0.10003
1.41837	0.14928
1.42087	0.13592
1.42337	0.08283
1.42587	0.14883
1.42837	0.31809
1.43087	0.26548
1.43337	0.27676
1.43587	0.25433
1.43836	0.23389
1.44086	0.36309
1.44336	0.42927
1.44586	0.44114
1.44836	0.42548
1.45086	0.40338
1.45336	0.41956
1.45586	0.50334
1.45836	0.56685
1.46086	0.58577
1.46336	0.68314
1.46586	0.86258
1.46835	1.00666
1.47085	0.81504
1.47335	1.12696
1.47585	1.40348
1.47835	1.07835
1.48085	1.04184
1.48335	1.11925
1.48585	0.9413
1.48835	1.06929
1.49085	1.05257
1.49335	1.02112
1.49585	1.00353
1.49835	1.04749
1.50084	1.12623
1.50334	1.05416
1.50584	0.93755
1.50834	1.04022
1.51084	1.02645
1.51334	0.7058
1.51584	0.7847
1.51834	1.04672
1.52084	0.9486
1.52334	0.78946
1.52584	0.68888
1.52834	0.64757
1.53083	0.43299
1.53333	0.47334
1.53583	0.50847
1.53833	0.40862
1.54083	0.46874
1.54333	0.47005
1.54583	0.32169
1.54833	0.29428
1.55083	0.25994
1.55333	0.19932
1.55583	0.2955
1.55833	0.18173
1.56083	0.083
1.56332	0.10248
1.56582	0.20447
1.56832	0.22621
1.57082	0.19454
1.57332	0.13132
1.57582	0.07701
1.57832	0.1935
1.58082	0.19128
1.58332	0.11866
1.58582	0.1312
1.58832	0.14274
1.59082	0.11821
1.59331	0.14416
1.59581	0.10132
1.59831	0.13299
1.60081	0.15989
1.60331	0.07081
1.60581	0.0784
1.60831	0.11444
1.61081	0.07521
1.61331	0.07995
1.61581	0.11471
1.61831	0.06927
1.62081	0.07561
1.62331	0.14488
1.6258	0.16041
1.6283	0.18916
1.6308	0.1792
1.6333	0.10747
1.6358	0.07557
1.6383	0.09646
1.6408	0.08891
1.6433	0.10005
1.6458	0.09256
1.6483	0.09746
1.6508	0.09101
1.6533	0.11715
1.65579	0.14318
1.65829	0.10197
1.66079	0.09964
1.66329	0.06478
1.66579	0.07866
1.66829	0.20066
1.67079	0.18699
1.67329	0.14133
1.67579	0.19536
1.67829	0.24346
1.68079	0.2784
1.68329	0.25239
1.68579	0.15727
1.68828	0.13391
1.69078	0.31657
1.69328	0.29805
1.69578	0.22428
1.69828	0.20354
1.70078	0.2611
1.70328	0.24526
1.70578	0.14546
1.70828	0.23447
1.71078	0.34442
1.71328	0.46233
1.71578	0.42101
1.71827	0.39173
1.72077	0.38368
1.72327	0.44826
1.72577	0.28515
1.72827	0.37964
1.73077	0.25638
1.73327	0.40464
1.73577	0.56933
1.73827	0.67023
1.74077	0.52438
1.74327	0.36818
1.74577	0.38812
1.74827	0.33791
1.75076	0.34615
1.75326	0.39218
1.75576	0.43203
1.75826	0.47372
1.76076	0.5108
1.76326	0.22887
1.76576	0.18617
1.76826	0.31894
1.77076	0.42271
1.77326	0.36876
1.77576	0.25661
1.77826	0.27613
1.78075	0.18612
1.78325	0.28327
1.78575	0.41649
1.78825	0.23407
1.79075	0.32004
1.79325	0.28721
1.79575	0.28706
1.79825	0.24202
1.80075	0.25171
1.80325	0.17898
1.80575	0.11978
1.80825	0.10589
1.81075	0.13316
1.81324	0.14526
1.81574	0.14928
1.81824	0.17585
1.82074	0.15611
1.82324	0.17376
1.82574	0.12873
1.82824	0.14672
1.83074	0.21029
1.83324	0.13453
1.83574	0.08058
1.83824	0.16367
1.84074	0.27884
1.84323	0.08982
1.84573	0.10023
1.84823	0.13563
1.85073	0.08671
1.85323	0.12783
1.85573	0.02858
1.85823	0.02766
1.86073	0.21998
1.86323	0.08979
1.86573	0.03806
1.86823	0.13361
1.87073	0.05889
1.87323	0.07441
1.87572	0.07564
1.87822	0.20115
1.88072	0.1665
1.88322	0.07495
1.88572	0.08838
1.88822	0.10135
1.89072	0.0492
1.89322	0.07867
1.89572	0.04847
1.89822	0.03756
1.90072	0.09513
1.90322	0.0505
1.90571	0.05928
1.90821	0.14681
1.91071	0.17897
1.91321	0.09654
1.91571	0.04609
1.91821	0.09527
1.92071	0.09843
1.92321	0.10114
1.92571	0.01301
1.92821	0.07854
1.93071	0.06363
1.93321	0.16235
1.93571	0.19918
1.9382	0.08912
1.9407	0.0756
1.9432	0.01562
1.9457	0.09686
1.9482	0.16504
1.9507	0.15206
1.9532	0.13541
1.9557	0.059
1.9582	0.00432
1.9607	0.07029
1.9632	0.08372
1.9657	0.0543
1.96819	0.17875
1.97069	0.03389
1.97319	0.09586
1.97569	0.00652
1.97819	0.01306
1.98069	0.14471
1.98319	0.13138
1.98569	0.13701
1.98819	0.22246
1.99069	0.05986
1.99319	0.17109
1.99569	0.05295
1.99819	0.07564
2.00068	0.03718
2.00318	-2.05e-07
2.00568	0.037
2.00818	0.03725
2.01068	-2.03e-07
2.01318	0.03709
2.01568	0.03733
2.01818	0.03718
2.02068	-2.01e-07
2.02318	0.03719
2.02568	0.07445
2.02818	6.70588e-05
2.03067	1.21176e-05
2.03317	1.83529e-05
2.03567	5.84706e-05
2.03817	-2e-07
2.04067	0.0372
2.04317	0.03703
2.04567	0.07437
2.04817	9.70588e-06
2.05067	0.03725
2.05317	0.03718
2.05567	-1.94e-07
2.05817	0.03703
2.06067	1.02353e-05
2.06316	-1.95e-07
2.06566	0.03718
2.06816	3.9e-08
2.07066	0.0372
2.07316	0.0373
2.07566	3.2e-06
2.07816	5.61176e-05
2.08066	0.11158
2.08316	1.28235e-05
2.08566	0.07452
2.08816	-1.88e-07
2.09066	0.03718
2.09315	-1.87e-07
2.09565	-1.39e-07
2.09815	-1.88e-07
2.10065	-1.89e-07
2.10315	-1.89e-07
2.10565	7.32941e-05
2.10815	0.07419
2.11065	0.03725
2.11315	0.03719
2.11565	-1.86e-07
2.11815	-1.87e-07
2.12065	0.03727
2.12315	1.11176e-05
2.12564	0.03718
2.12814	0.03718
2.13064	0.03725
2.13314	0.03706
2.13564	0.32169
2.13814	0.29428
2.14064	0.25994
2.14314	0.19932
2.14564	0.2955
2.14814	0.18173
2.15064	0.083
2.15314	0.10248
2.15563	0.20447
2.15813	0.22621
2.16063	0.19454
2.16313	0.13132
2.16563	0.07701
2.16813	0.1935
2.17063	0.19128
2.17313	0.11866
2.17563	0.1312
2.17813	0.14274
2.18063	0.11821
2.18313	0.14416
2.18563	0.10132
2.18812	0.13299
2.19062	0.15989
2.19312	0.07081
2.19562	0.0784
2.19812	0.11444
2.20062	0.07521
2.20312	0.07995
2.20562	0.11471
2.20812	0.06927
2.21062	0.07561
2.21312	0.14488
2.21562	0.16041
2.21811	0.07419
2.22061	0.03725
2.22311	0.03719
2.22561	0.32169
2.22811	0.29428
2.23061	0.25994
2.23311	0.19932
2.23561	0.2955
2.23811	0.18173
2.24061	0.083
2.24311	0.10248
2.24561	0.20447
2.24811	0.22621
2.2506	0.19454
2.2531	0.13132
2.2556	0.07701
2.2581	0.1935
2.2606	0.19128
2.2631	0.11866
2.2656	0.1312
2.2681	0.14274
2.2706	0.11821
2.2731	0.14416
2.2756	0.10132
2.2781	0.13299
2.28059	0.15989
2.28309	0.07081
2.28559	0.0784
2.28809	0.11444
2.29059	0.07521
2.29309	0.07995
2.29559	0.11471
2.29809	0.06927
2.30059	0.07561
2.30309	0.14488
2.30559	0.16041
2.30809	1.0698
2.31059	0.9942
2.31308	1.03951
2.31558	1.14444
2.31808	0.82892
2.32058	0.87004
2.32308	1.06843
2.32558	0.99049
2.32808	1.01286
2.33058	0.93877
2.33308	1.1072
2.33558	0.93303
2.33808	0.90747
2.34058	0.98065
2.34307	0.7163
2.34557	0.50381
2.34807	0.60065
2.35057	0.71115
2.35307	0.53548
2.35557	0.38087
2.35807	0.38673
2.36057	0.39475
2.36307	0.62826
2.36557	0.54804
2.36807	0.46479
2.37057	0.45117
2.37307	0.3641
2.37556	0.2974
2.37806	0.29129
2.38056	0.42772
2.38306	0.46584
2.38556	0.37702
2.38806	0.23226
2.39056	0.3006
2.39306	0.29808
2.39556	0.29953
2.39806	0.21458
2.40056	0.09409
2.40306	0.11305
2.40555	0.15487
2.40805	0.22225
2.41055	0.17965
2.41305	0.08437
2.41555	0.09992
2.41805	0.18735
2.42055	0.12306
2.42305	0.11126
2.42555	0.22555
2.42805	0.16432
2.43055	0.09326
2.43305	0.11216
2.43555	0.11149
2.43804	0.11476
2.44054	0.09907
2.44304	0.11055
2.44554	0.18591
2.44804	0.16077
2.45054	0.10898
2.45304	0.19967
2.45554	0.21204
2.45804	0.14902
2.46054	0.14612
2.46304	0.1477
2.46554	0.14856
2.46803	0.09629
2.47053	0.08751
2.47303	0.07895
2.47553	0.09038
2.47803	0.15305
2.48053	0.14979
2.48303	0.19121
2.48553	0.15232
2.48803	0.09536
2.49053	0.15097
2.49303	0.15352
2.49553	0.11299
2.49803	0.13032
2.50052	0.13179
2.50302	0.09425
2.50552	0.05485
2.50802	0.07562
2.51052	0.1118
2.51302	0.10967
2.51552	0.09486
2.51802	0.07429
2.52052	0.07753
2.52302	0.11104
2.52552	0.07214
2.52802	0.11793
2.53051	0.18777
2.53301	0.10962
2.53551	0.05863
2.53801	0.09333
2.54051	0.13211
2.54301	0.109
2.54551	0.03459
2.54801	0.04142
2.55051	0.03315
2.55301	0.06216
2.55551	0.13194
2.55801	0.12967
2.56051	0.07242
2.563	0.03734
2.5655	0.05862
2.568	0.07469
2.5705	0.07511
2.573	0.0542
2.5755	0.0817
2.578	0.09115
2.5805	0.05122
2.583	0.08057
2.5855	0.09081
2.588	0.09783
2.5905	0.11368
2.59299	0.08981
2.59549	0.09759
2.59799	0.11359
2.60049	0.11395
2.60299	0.09175
2.60549	0.09822
2.60799	0.15885
2.61049	0.14159
2.61299	0.08964
2.61549	0.09867
2.61799	0.13526
2.62049	0.12525
2.62299	0.11117
2.62548	0.15973
2.62798	0.2609
2.63048	0.15752
2.63298	0.05038
2.63548	0.18042
2.63798	0.21419
2.64048	0.14054
2.64298	0.18787
2.64548	0.10441
2.64798	0.13529
2.65048	0.13538
2.65298	0.08822
2.65547	0.12661
2.65797	0.07586
2.66047	0.06291
2.66297	0.07458
2.66547	0.09914
2.66797	0.1112
2.67047	0.11363
2.67297	0.13889
2.67547	0.12158
2.67797	0.08529
2.68047	0.04987
2.68297	0.1166
2.68547	0.09778
2.68796	0.10177
2.69046	0.0876
2.69296	0.04802
2.69546	0.03781
2.69796	0.04091
2.70046	0.09233
2.70296	0.13856
2.70546	0.04216
2.70796	0.05454
2.71046	0.10284
2.71296	0.11214
2.71546	0.08574
2.71795	0.04856
2.72045	0.034
2.72295	0.0613
2.72545	0.07522
2.72795	0.02034
2.73045	0.02821
2.73295	0.03749
2.73545	0.00952
2.73795	0.11304
2.74045	0.06389
2.74295	0.04015
2.74545	0.07011
2.74795	0.10465
2.75044	0.08398
2.75294	0.10447
2.75544	0.02608
2.75794	-6.61e-07
2.76044	0.05876
2.76294	0.07559
2.76544	0.01657
2.76794	0.02591
2.77044	0.1241
2.77294	0.0908
2.77544	0.1043
2.77794	0.0827
2.78043	0.16502
2.78293	0.03785
2.78543	0.05984
2.78793	0.01483
2.79043	0.06309
2.79293	0.04546
2.79543	0.06964
2.79793	0.10566
2.80043	0.05203
2.80293	0.09802
2.80543	0.01964
2.80793	0.12388
2.81043	0.05844
2.81292	0.09918
2.81542	0.07997
2.81792	0.04072
2.82042	0.06891
2.82292	0.07412
2.82542	0.10735
2.82792	0.0822
2.83042	0.07683
2.83292	0.07244
2.83542	0.10724
2.83792	0.04861
2.84042	0.03834
2.84291	0.03815
2.84541	0.03834
2.84791	0.00537
2.85041	0.0662
2.85291	0.04058
2.85541	0.03792
2.85791	0.13777
2.86041	0.08391
2.86291	0.00866
2.86541	0.0336
2.86791	0.07066
2.87041	0.04154
2.87291	0.0356
2.8754	0.00362
2.8779	0.10099
2.8804	0.07794
2.8829	0.10828
2.8854	0.11218
2.8879	0.0104
2.8904	3.70588e-05
2.8929	0.10393
2.8954	0.04397
2.8979	0.14295
2.9004	0.0476
2.9029	0.00286
2.90539	0.03533
2.90789	0.0033
2.91039	0.03434
2.91289	0.03882
2.91539	0.00235
2.91789	0.07016
2.92039	0.07392
2.92289	0.03728
2.92539	0.10858
2.92789	0.04291
2.93039	0.00174
2.93289	0.07212
2.93539	0.0746
2.93788	0.00269
2.94038	0.0726
2.94288	0.11328
2.94538	0.14961
2.94788	0.04165
2.95038	0.10794
2.95288	0.03625
2.95538	0.07577
2.95788	0.03934
2.96038	0.000469471
2.96288	0.03845
2.96538	0.07218
2.96787	0.11249
2.97037	0.037
2.97287	0.00113
2.97537	0.15087
2.97787	0.000418471
2.98037	0.03501
2.98287	0.000630471
2.98537	0.0369
2.98787	0.03658
2.99037	0.000930882
2.99287	0.03922
2.99537	0.10995
2.99787	0.03889
3.00036	0.07155
3.00286	0.00292
3.00536	0.07606
3.00786	0.07735
3.01036	0.11021
3.01286	0.03967
3.01536	0.07514
3.01786	0.07384
3.02036	0.03936
3.02286	0.07625
3.02536	0.07348
3.02786	0.03772
3.03035	0.03929
3.03285	0.0776
3.03535	0.10826
3.03785	0.08372
3.04035	0.1762
3.04285	0.04319
3.04535	0.10546
3.04785	0.03946
3.05035	0.0692
3.05285	0.00345
3.05535	0.03782
3.05785	0.04565
3.06035	0.10444
3.06284	0.03962
3.06534	0.07003
3.06784	0.05045
3.07034	0.13441
3.07284	0.00427
3.07534	0.03769
3.07784	0.05853
3.08034	0.20643
3.08284	0.07168
3.08534	0.03864
3.08784	0.03832
3.09034	0.04684
3.09283	0.10266
3.09533	0.04884
3.09783	0.09838
3.10033	0.0053
3.10283	0.03191
3.10533	0.00525
3.10783	0.0416
3.11033	0.08103
3.11283	0.10102
3.11533	0.03777
3.11783	0.03728
3.12033	0.04218
3.12283	0.07393
3.12532	0.06326
3.12782	0.02027
3.13032	0.10724
3.13282	0.07453
3.13532	0.07544
3.13782	0.06822
3.14032	0.03064
3.14282	0.0076
3.14532	0.05236
3.14782	0.12655
3.15032	0.15757
3.15282	0.04467
3.15531	0.06615
3.15781	0.0449
3.16031	0.05961
3.16281	0.01619
3.16531	0.06714
3.16781	0.02922
3.17031	0.000664471
3.17281	0.000257353
3.17531	0.00857
3.17781	0.05441
3.18031	0.10482
3.18281	0.05749
3.18531	0.0086
3.1878	0.04611
3.1903	0.07514
3.1928	0.06457
3.1953	0.03661
3.1978	0.03725
3.2003	0.0381
3.2028	0.07459
3.2053	0.13996
3.2078	0.01986
3.2103	0.07476
3.2128	0.055
3.2153	0.01022
3.21779	0.02862
3.22029	0.00996
3.22279	0.04548
3.22529	0.07538
3.22779	0.07507
3.23029	0.08561
3.23279	0.11298
3.23529	0.08141
3.23779	0.02159
3.24029	0.07473
3.24279	0.0855
3.24529	0.10179
3.24779	0.05352
3.25028	-1.48e-06
3.25278	0.02245
3.25528	0.06221
3.25778	0.05928
3.26028	0.08835
3.26278	0.04922
3.26528	0.09847
3.26778	0.17427
3.27028	0.18849
3.27278	0.0765
3.27528	0.03768
3.27778	0.10055
3.28027	0.06272
3.28277	0.02548
3.28527	0.05047
3.28777	0.13595
3.29027	0.09958
3.29277	0.07525
3.29527	0.07465
3.29777	0.08641
3.30027	0.08733
3.30277	0.07414
3.30527	0.12571
3.30777	0.06244
3.31027	0.03696
3.31276	0.02649
3.31526	0.04641
3.31776	0.10182
3.32026	1.67647e-05
3.32276	4.01765e-05
3.32526	-2.11e-06
3.32776	0.01113
3.33026	0.05966
3.33276	0.12397
3.33526	0.1382
3.33776	0.09937
3.34026	0.0634
3.34275	0.05949
3.34525	0.08993
3.34775	0.0368
3.35025	0.02636
3.35275	0.02068
3.35525	0.06337
3.35775	0.02592
3.36025	0.03121
3.36275	0.1131
3.36525	0.13194
3.36775	0.1367
3.37025	0.01006
3.37275	0.03806
3.37524	0.03852
3.37774	0.03807
3.38024	0.04769
3.38274	0.07536
3.38524	0.06511
3.38774	0.03631
3.39024	0.02835
3.39274	0.01828
3.39524	0.08326
3.39774	0.11119
3.40024	0.10098
3.40274	0.05703
3.40523	0.01677
3.40773	0.06399
3.41023	0.03662
3.41273	0.05445
3.41523	0.11904
3.41773	0.11534
3.42023	0.02479
3.42273	0.09659
3.42523	0.03839
3.42773	0.02986
3.43023	0.0164
3.43273	0.06032
3.43523	0.00737
3.43772	0.03637
3.44022	0.03051
3.44272	0.000497118
3.44522	0.02194
3.44772	0.1041
3.45022	0.06764
3.45272	0.04399
3.45522	0.08188
3.45772	0.09779
3.46022	0.05187
3.46272	0.09252
3.46522	0.00671
3.46771	0.03712
3.47021	0.05642
3.47271	0.13641
3.47521	0.06618
3.47771	0.04982
3.48021	0.09867
3.48271	0.04957
3.48521	0.1
3.48771	0.03686
3.49021	0.03734
3.49271	0.05482
3.49521	0.13768
3.49771	0.07482
3.5002	0.06438
3.5027	0.01071
3.5052	0.07455
3.5077	0.08042
3.5102	0.11643
3.5127	0.13355
3.5152	0.03605
3.5177	0.03181
3.5202	0.00513
3.5227	0.0425
3.5252	0.06958
3.5277	0.04243
3.53019	0.06617
3.53269	5.54118e-05
3.53519	0.01336
3.53769	0.10003
3.54019	0.00472
3.54269	0.03753
3.54519	0.03327
3.54769	0.00387
3.55019	0.04118
3.55269	0.07748
3.55519	0.1154
3.55769	0.13744
3.56019	0.04044
3.56268	0.07072
3.56518	0.04071
3.56768	0.06847
3.57018	8.72353e-05
3.57268	0.00668
3.57518	0.08365
3.57768	0.18
3.58018	0.11091
3.58268	0.10769
3.58518	0.04089
3.58768	0.07203
3.59018	0.04685
3.59267	0.1792
3.59517	0.08395
3.59767	0.21702
3.60017	0.11537
3.60267	0.18519
3.60517	0.14436
3.60767	0.04774
3.61017	0.25537
3.61267	0.18471
3.61517	0.14521
3.61767	0.08017
3.62017	0.2246
3.62267	0.26217
3.62516	0.26678
3.62766	0.41255
3.63016	0.48309
3.63266	0.44474
3.63516	0.33652
3.63766	0.30134
3.64016	0.44868
3.64266	0.48787
3.64516	0.6338
3.64766	0.59307
3.65016	0.44845
3.65266	0.55994
3.65515	0.59833
3.65765	0.78302
3.66015	1.08015
3.66265	0.85849
3.66515	0.97114
3.66765	0.93295
3.67015	1.30531
3.67265	1.12029
3.67515	0.97055
3.67765	0.56345
3.68015	0.92852
3.68265	1.15417
3.68515	1.26651
3.68764	1.12282
3.69014	1.19274
3.69264	1.33873
3.69514	1.05058
3.69764	1.18995
3.70014	1.41133
3.70264	1.45355
3.70514	1.52607
3.70764	1.85257
3.71014	1.18393
3.71264	0.97536
3.71514	1.21864
3.71763	1.12435
3.72013	1.58132
3.72263	1.42634
3.72513	1.02803
3.72763	0.90118
3.73013	0.68433
3.73263	0.67137
3.73513	0.98632
3.73763	1.07766
3.74013	0.7689
3.74263	0.81539
3.74513	0.71635
3.74763	0.74281
3.75012	0.64233
3.75262	0.73756
3.75512	0.26539
3.75762	0.77175
3.76012	0.71825
3.76262	0.40226
3.76512	0.3721
3.76762	0.54249
3.77012	0.49171
3.77262	0.215
3.77512	0.3205
3.77762	0.67061
3.78011	0.37343
3.78261	0.40231
3.78511	0.24306
3.78761	0.05647
3.79011	0.1362
3.79261	0.1823
3.79511	0.12044
3.79761	0.14472
3.80011	0.24847
3.80261	0.06541
3.80511	0.13437
3.80761	0.0842
3.81011	0.13987
3.8126	0.05211
3.8151	0.13404
3.8176	0.05114
3.8201	0.10129
3.8226	0.14402
3.8251	0.05188
3.8276	0.06787
3.8301	0.01117
3.8326	6.62353e-05
3.8351	-8.24e-07
3.8376	0.03108
3.8401	0.0059
3.84259	0.03148
3.84509	0.0064
3.84759	0.06231
3.85009	0.01228
3.85259	0.03111
3.85509	0.0373
3.85759	0.00682
3.86009	0.000432471
3.86259	0.03116
3.86509	0.06787
3.86759	0.13558
3.87009	0.02732
3.87259	-8.31e-07
3.87508	0.03067
3.87758	0.06771
3.88008	0.04449
3.88258	0.03687
3.88508	0.00723
3.88758	-8.28e-07
3.89008	0.000392765
3.89258	0.05974
3.89508	0.07541
3.89758	0.07557
3.90008	0.04563
3.90258	0.03648
3.90507	0.03699
3.90757	0.03693
3.91007	0.06661
3.91257	0.13233
3.91507	0.03328
3.91757	0.11492
3.92007	0.09023
3.92257	0.01683
3.92507	0.08527
3.92757	0.0539
3.93007	0.0943
3.93257	0.08413
3.93507	0.04618
3.93756	0.06575
3.94006	0.075
3.94256	0.01895
3.94506	0.02797
3.94756	0.06557
3.95006	0.10277
3.95256	0.0844
3.95506	0.12934
3.95756	0.14798
3.96006	0.0937
3.96256	0.07435
3.96506	0.07354
3.96755	0.0746
3.97005	0.12817
3.97255	0.06785
3.97505	0.091
3.97755	0.13826
3.98005	0.12252
3.98255	0.13902
3.98505	0.20256
3.98755	0.06476
3.99005	0.15869
3.99255	0.19632
3.99505	0.16002
3.99755	0.20156
4.00004	0.17153
4.00254	0.14939
4.00504	0.12309
4.00754	0.11145
4.01004	0.13766
4.01254	0.12386
4.01504	0.11132
4.01754	0.13744
4.02004	0.19982
4.02254	0.14767
4.02504	0.11193
4.02754	0.18681
4.03003	0.19798
4.03253	0.21096
4.03503	0.17318
4.03753	0.198
4.04003	0.24852
4.04253	0.18711
4.04503	0.1492
4.04753	0.12449
4.05003	0.13584
4.05253	0.12479
4.05503	0.13631
4.05753	0.12543
4.06003	0.30405
4.06252	0.31429
4.06502	0.11745
4.06752	0.13158
4.07002	0.11469
4.07252	0.05075
4.07502	0.03705
4.07752	0.06056
4.08002	0.0748
4.08252	0.0741
4.08502	0.07411
4.08752	0.07401
4.09002	0.05138
4.09251	0.06063
4.09501	0.09756
4.09751	0.1113
4.10001	0.04357
4.10251	0.000113412
4.10501	0.04415
4.10751	0.02903
4.11001	0.02228
4.11251	0.05931
4.11501	0.03002
4.11751	0.06626
4.12001	0.04567
4.12251	0.06571
4.125	0.0463
4.1275	0.04345
4.13	0.05281
4.1325	0.03767
4.135	0.01598
4.1375	0.04309
4.14	0.09623
4.1425	0.06948
4.145	0.01627
4.1475	0.000387
4.15	0.04208
4.1525	0.09537
4.15499	0.09073
4.15749	0.03281
4.15999	4.87647e-05
4.16249	0.04097
4.16499	0.03329
4.16749	0.08153
4.16999	0.08797
4.17249	0.01709
4.17499	-3.41e-07
4.17749	0.02014
4.17999	0.05739
4.18249	0.0548
4.18499	0.01759
4.18748	0.000129765
4.18998	0.01965
4.19248	0.01759
4.19498	-3.46e-07
4.19748	0.000135529
4.19998	0.03868
4.20248	0.03592
4.20498	0.07678
4.20748	0.0917
4.20998	0.07511
4.21248	0.05515
4.21498	0.03753
4.21747	0.05567
4.21997	0.01866
4.22247	-3.38e-07
4.22497	0.0185
4.22747	0.0189
4.22997	4.22353e-05
4.23247	0.03666
4.23497	0.0384
4.23747	5.28824e-05
4.23997	5.64118e-05
4.24247	7.12353e-05
4.24497	0.03577
4.24747	0.03924
4.24996	0.01795
4.25246	0.03751
4.25496	0.0201
4.25746	0.05219
4.25996	0.05954
4.26246	0.01712
4.26496	0.02004
4.26746	0.01718
4.26996	0.0711
4.27246	0.06089
4.27496	0.01656
4.27746	0.03669
4.27995	0.02032
4.28245	0.01645
4.28495	0.05366
4.28745	0.05818
4.28995	0.03732
4.29245	0.03739
4.29495	0.0372
4.29745	0.03703
4.29995	0.0372
4.30245	0.05331
4.30495	0.04315
4.30745	0.000196765
4.30995	0.03112
4.31244	0.04322
4.31494	0.01528
4.31744	0.03698
4.31994	0.02193
4.32244	-3.45e-07
4.32494	0.015
4.32744	0.05211
4.32994	0.04459
4.33244	0.01469
4.33494	0.02218
4.33744	0.000169059
4.33994	0.02963
4.34243	0.04567
4.34493	0.000109471
4.34743	0.000110941
4.34993	8.71176e-05
4.35243	0.01438
4.35493	0.02343
4.35743	0.01413
4.35993	0.03751
4.36243	0.03739
4.36493	0.03709
4.36743	0.03705
4.36993	0.03719
4.37243	0.03724
4.37492	0.03735
4.37742	0.02399
4.37992	0.01321
4.38242	0.06325
4.38492	0.07196
4.38742	-3.51e-07
4.38992	-3.53e-07
4.39242	-3.55e-07
4.39492	0.02561
4.39742	0.1
4.39992	0.09857
4.40242	9.36471e-05
4.40491	0.01276
4.40741	0.02518
4.40991	0.01234
4.41241	0.03749
4.41491	0.03757
4.41741	0.02559
4.41991	0.02381
4.42241	0.08567
4.42491	0.0879
4.42741	0.02568
4.42991	0.000167765
4.43241	0.01161
4.43491	0.02613
4.4374	0.000186941
4.4399	0.01103
4.4424	0.02544
4.4449	2.11176e-05
4.4474	0.02204
4.4499	0.06358
4.4524	0.03733
4.4549	0.02643
4.4574	-3.52e-07
4.4599	0.01047
4.4624	0.02651
4.4649	0.000113824
4.46739	0.03104
4.46989	0.11187
4.47239	0.08127
4.47489	3.75882e-05
4.47739	2.8e-05
4.47989	0.01004
4.48239	0.03739
4.48489	0.02756
4.48739	0.01949
4.48989	0.05505
4.49239	3.61176e-05
4.49489	0.00953
4.49739	0.02796
4.49988	2.57059e-05
4.50238	0.01843
4.50488	0.07452
4.50738	0.05616
4.50988	0.00882
4.51238	0.05459
4.51488	0.11171
4.51738	0.10315
4.51988	0.0571
4.52238	0.00845
4.52488	0.03688
4.52738	0.04527
4.52987	0.06607
4.53237	0.03696
4.53487	0.03745
4.53737	0.02922
4.53987	0.01592
4.54237	0.05889
4.54487	0.0078
4.54737	0.02989
4.54987	0.01513
4.55237	0.07457
4.55487	0.06715
4.55737	0.03008
4.55987	0.00726
4.56236	0.04391
4.56486	0.08118
4.56736	0.0908
4.56986	0.0069
4.57236	0.0305
4.57486	1.93529e-05
4.57736	0.000100647
4.57986	0.0197
4.58236	0.09236
4.58486	0.00638
4.58736	0.03728
4.58986	0.03134
4.59235	0.000369824
4.59485	2.72353e-05
4.59735	0.000154059
4.59985	0.01184
4.60235	0.06887
4.60485	0.0316
4.60735	0.00557
4.60985	0.03695
4.61235	0.03185
4.61485	0.0053
4.61735	0.03152
4.61985	0.01035
4.62235	0.06904
4.62484	0.03717
4.62734	0.03713
4.62984	0.03706
4.63234	0.03675
4.63484	0.03197
4.63734	0.00946
4.63984	0.06549
4.64234	0.00451
4.64484	0.03306
4.64734	0.000271118
4.64984	0.00429
4.65234	0.03311
4.65483	0.000276941
4.65733	0.0042
4.65983	0.03371
4.66233	0.00399
4.66483	0.0369
4.66733	0.03687
4.66983	0.04083
4.67233	0.07096
4.67483	0.03393
4.67733	0.00329
4.67983	0.03411
4.68233	0.00306
4.68483	0.03978
4.68732	0.07104
4.68982	0.03432
4.69232	0.00277
4.69482	0.03462
4.69732	0.00778
4.69982	0.11155
4.70232	0.10395
4.70482	-3.34e-07
4.70732	0.0068
4.70982	0.10554
4.71232	0.00647
4.71482	0.10785
4.71731	0.03724
4.71981	0.03732
4.72231	0.0356
4.72481	0.00362
4.72731	0.07441
4.72981	0.07302
4.73231	0.0372
4.73481	0.03692
4.73731	0.03802
4.73981	0.07315
4.74231	0.03674
4.74481	0.03617
4.74731	0.000904529
4.7498	0.03677
4.7523	0.03619
4.7548	0.000155
4.7573	-3.24e-07
4.7598	0.000497059
4.7623	0.03733
4.7648	0.03701
4.7673	0.000418706
4.7698	0.03749
4.7723	6.23529e-06
4.7748	-3.3e-07
4.7773	0.000278529
4.77979	0.03695
4.78229	9.11176e-05
4.78479	0.07403
4.78729	0.03759
4.78979	0.03717
4.79229	0.03716
4.79479	0.0368
4.79729	0.07302
4.79979	0.00149
4.80229	0.03655
4.80479	0.03692
4.80729	0.00107
4.80979	0.03646
4.81228	0.07328
4.81478	0.07399
4.81728	0.00252
4.81978	3.42e-06
4.82228	0.10742
4.82478	0.00484
4.82728	0.07082
4.82978	0.07416
4.83228	0.00359
4.83478	2.82e-06
4.83728	-3.24e-07
4.83978	0.03517
4.84227	0.0024
4.84477	0.000447706
4.84727	3.91765e-05
4.84977	0.0348
4.85227	0.03714
4.85477	0.07193
4.85727	0.07415
4.85977	0.00537
4.86227	-3.25e-07
4.86477	0.000137176
4.86727	1.14706e-05
4.86977	0.03377
4.87227	0.07023
4.87476	0.0063
4.87726	-3.27e-07
4.87976	5.09e-06
4.88226	0.06773
4.88476	0.00734
4.88726	2.65294e-05
4.88976	0.000135176
4.89226	1.5e-05
4.89476	2.68e-06
4.89726	0.03337
4.89976	0.03759
4.90226	0.00418
4.90475	0.06608
4.90725	0.04147
4.90975	0.03655
4.91225	0.00437
4.91475	7.74118e-05
4.91725	0.03226
4.91975	0.00466
4.92225	0.03236
4.92475	0.00487
4.92725	0.03215
4.92975	0.00503
4.93225	0.03172
4.93475	0.06901
4.93724	0.04266
4.93974	0.00554
4.94224	0.0634
4.94474	0.04283
4.94724	0.06876
4.94974	0.01155
4.95224	0.0314
4.95474	0.03717
4.95724	0.00597
4.95974	0.03135
4.96224	0.03768
4.96474	0.03745
4.96723	0.00634
4.96973	0.000218941
4.97223	0.12286
4.97473	0.02621
4.97723	0.03023
4.97973	0.0371
4.98223	0.03715
4.98473	0.0069
4.98723	0.0301
4.98973	0.03612
4.99223	0.03639
4.99473	0.03712
4.99723	0.00732
[truncated: 2,000 more rows]
