# Supplementary material for: Swelling Pressure of Double‐Expansive Material and Its Active Support Effect for Coal Seam Gas Drainage Borehole
Source: Hindawi journal article supplement (doi:10.1155/2018/8245036), 2018-01-01
Supplement: f1 [file 8245036.f1.zip › EDS data for CH.xls]

## Sheet: Sheet1
0.00132	79.1381
0.00382	71.1449
0.00632	59.2791
0.00882	53.4704
0.01132	42.7465
0.01382	37.8314
0.01632	31.4269
0.01882	25.7671
0.02132	22.4903
0.02382	17.8731
0.02632	14.4474
0.02882	10.0784
0.03131	7.74501
0.03381	5.65982
0.03631	4.61722
0.03881	3.17744
0.04131	2.0852
0.04381	1.53907
0.04631	1.0426
0.04881	0.59577
0.05131	0.39718
0.05381	0.39718
0.05631	0.24824
0.05881	0.24824
0.06131	0.04965
0.0638	0.04965
0.0663	0.04965
0.0688	0
0.0713	0
0.0738	0
0.0763	0
0.0788	0
0.0813	0
0.0838	0
0.0863	0
0.0888	0
0.0913	0
0.09379	0
0.09629	0
0.09879	0
0.10129	0
0.10379	0
0.10629	0
0.10879	0
0.11129	0
0.11379	0
0.11629	0
0.11879	0
0.12129	0.64182
0.12379	1.67196
0.12628	6.26869
0.12878	8.86364
0.13128	10.1611
0.13378	10.5287
0.13628	10.2505
0.13878	9.97088
0.14128	9.30507
0.14378	9.13029
0.14628	8.38533
0.14878	7.43872
0.15128	6.43186
0.15378	5.84307
0.15627	5.61725
0.15877	5.23296
0.16127	4.42819
0.16377	3.42876
0.16627	2.86531
0.16877	2.45682
0.17127	2.03554
0.17377	1.79096
0.17627	1.46798
0.17877	1.1809
0.18127	0.88951
0.18377	0.67468
0.18627	0.60451
0.18876	0.50694
0.19126	0.35181
0.19376	0.22207
0.19626	0.18878
0.19876	0.20195
0.20126	0.22605
0.20376	0.2386
0.20626	0.14819
0.20876	0.12846
0.21126	0.09637
0.21376	0.05032
0.21626	0.06031
0.21875	0.03495
0.22125	0.01921
0.22375	0
0.22625	0.00184
0.22875	0.04075
0.23125	0.04548
0.23375	0.12126
0.23625	0.05506
0.23875	0.04954
0.24125	0.05752
0.24375	0.10448
0.24625	0.08619
0.24875	0.1277
0.25124	0.10369
0.25374	0.08319
0.25624	0.02867
0.25874	0.06947
0.26124	0.06472
0.26374	0.06434
0.26624	0.04258
0.26874	0.02026
0.27124	0.13613
0.27374	0.11642
0.27624	0.11177
0.27874	0.1189
0.28123	0.0718
0.28373	0.12022
0.28623	0.0855
0.28873	0.18067
0.29123	0.11006
0.29373	0.1475
0.29623	0.04679
0.29873	0.08296
0.30123	0.02138
0.30373	0.00678
0.30623	0.07588
0.30873	0.10368
0.31123	0.11422
0.31372	0.10582
0.31622	0.11243
0.31872	0.06671
0.32122	0.08357
0.32372	0.04163
0.32622	0
0.32872	0
0.33122	0
0.33372	0.05506
0.33622	0.00034124
0.33872	0.03257
0.34122	0.09737
0.34371	0.09705
0.34621	0.11115
0.34871	0.02809
0.35121	0
0.35371	0
0.35621	0
0.35871	0
0.36121	0.02849
0.36371	0.05319
0.36621	0.17779
0.36871	0.09198
0.37121	0.04119
0.37371	0.03545
0.3762	0.02647
0.3787	0.05705
0.3812	0
0.3837	0
0.3862	0.03939
0.3887	0.0055
0.3912	0.03926
0.3937	0.05294
0.3962	0.05954
0.3987	0.09525
0.4012	0.09878
0.4037	0.04397
0.40619	0.01439
0.40869	0.01001
0.41119	0
0.41369	0
0.41619	0
0.41869	0
0.42119	0
0.42369	0.00342
0.42619	0.07043
0.42869	0.09154
0.43119	0.09379
0.43369	0.09025
0.43619	0.08033
0.43868	0.04465
0.44118	0
0.44368	0
0.44618	0
0.44868	0
0.45118	0
0.45368	0
0.45618	0.03229
0.45868	0.05773
0.46118	0.0781
0.46368	0.02212
0.46618	0
0.46867	0.03581
0.47117	0.02952
0.47367	0.10556
0.47617	0.0694
0.47867	0.06176
0.48117	0.07129
0.48367	0.03986
0.48617	0.04931
0.48867	0.00563
0.49117	0
0.49367	0.03498
0.49617	0.0559
0.49867	0.0253
0.50116	0.19137
0.50366	0.17128
0.50616	0.18281
0.50866	0.1207
0.51116	0.07102
0.51366	0.1197
0.51616	0.1892
0.51866	0.26493
0.52116	0.1636
0.52366	0.15751
0.52616	0.06013
0.52866	0.26552
0.53115	0.26648
0.53365	0.16749
0.53615	0.15645
0.53865	0.12046
0.54115	0.15711
0.54365	0.30137
0.54615	0.25253
0.54865	0.30936
0.55115	0.14675
0.55365	0.1053
0.55615	0
0.55865	0
0.56115	0.07913
0.56364	0.15039
0.56614	0.03553
0.56864	0.04836
0.57114	0.04109
0.57364	0.07156
0.57614	0.07641
0.57864	0.09598
0.58114	0
0.58364	0.01768
0.58614	0.04877
0.58864	0.02111
0.59114	0
0.59363	0
0.59613	0.02143
0.59863	0.0139
0.60113	0
0.60363	0
0.60613	0
0.60863	0.01753
0.61113	0.00409
0.61363	0
0.61613	0
0.61863	0.02173
0.62113	0.02648
0.62363	0.03224
0.62612	0
0.62862	0
0.63112	0.00929
0.63362	0.00994
0.63612	0.05979
0.63862	0.02795
0.64112	0
0.64362	0
0.64612	0.03273
0.64862	0.01276
0.65112	0
0.65362	0
0.65611	0
0.65861	0.09497
0.66111	0.03453
0.66361	0
0.66611	0
0.66861	0
0.67111	0.12434
0.67361	0.01596
0.67611	0.01447
0.67861	0.01725
0.68111	0.04805
0.68361	0.06526
0.68611	0.01902
0.6886	0
0.6911	0.08482
0.6936	0
0.6961	0.06067
0.6986	0.01096
0.7011	0.08499
0.7036	0.14258
0.7061	0.14885
0.7086	0.00433
0.7111	0.25383
0.7136	0.1561
0.7161	0.00372
0.71859	0.04449
0.72109	0.05905
0.72359	0.25757
0.72609	0.16447
0.72859	0.40587
0.73109	0.45286
0.73359	0.29837
0.73609	0.20642
0.73859	0.44557
0.74109	0.14707
0.74359	0.10363
0.74609	0.24608
0.74859	0.26112
0.75108	0.43894
0.75358	0.34807
0.75608	0.31854
0.75858	0.4998
0.76108	0.48345
0.76358	0.8157
0.76608	0.30733
0.76858	0.35884
0.77108	0.41592
0.77358	0.52441
0.77608	0.65608
0.77858	0.6152
0.78107	0.79031
0.78357	1.02537
0.78607	0.65214
0.78857	0.58499
0.79107	0.7714
0.79357	0.48617
0.79607	0.805
0.79857	0.78008
0.80107	0.60157
0.80357	0.62677
0.80607	0.80374
0.80857	0.73848
0.81107	0.38019
0.81356	0.94193
0.81606	0.81294
0.81856	0.823
0.82106	0.93392
0.82356	1.00035
0.82606	0.574
0.82856	0.38666
0.83106	0.55876
0.83356	0.56532
0.83606	0.56492
0.83856	0.39724
0.84106	0.6497
0.84355	0.62777
0.84605	0.73967
0.84855	0.63168
0.85105	0.48574
0.85355	0.42137
0.85605	0.48714
0.85855	0.4105
0.86105	0.46179
0.86355	0.50477
0.86605	0.52396
0.86855	0.58818
0.87105	0.47025
0.87355	0.37356
0.87604	0.42107
0.87854	0.32518
0.88104	0.41007
0.88354	0.42866
0.88604	0.52449
0.88854	0.5656
0.89104	0.41318
0.89354	0.47785
0.89604	0.52106
0.89854	0.44036
0.90104	0.51583
0.90354	0.38315
0.90603	0.34822
0.90853	0.35016
0.91103	0.37719
0.91353	0.41165
0.91603	0.25536
0.91853	0.2018
0.92103	0.13132
0.92353	0.33456
0.92603	0.14048
0.92853	0.28341
0.93103	0.2728
0.93353	0.10445
0.93603	0.2594
0.93852	0.13549
0.94102	0.09891
0.94352	0.11364
0.94602	0.14738
0.94852	0.1123
0.95102	0.06038
0.95352	0.07459
0.95602	0.03269
0.95852	0.11494
0.96102	0.13441
0.96352	0.11693
0.96602	0.10993
0.96851	0.04714
0.97101	0.17249
0.97351	0.15489
0.97601	0.0647
0.97851	0.06647
0.98101	0.03124
0.98351	0.10046
0.98601	0.09561
0.98851	0.06524
0.99101	0.0475
0.99351	0.18261
0.99601	0.20297
0.99851	0.06938
1.001	0.03547
1.0035	0.13295
1.006	0.20055
1.0085	0.23717
1.011	0.23751
1.0135	0.10018
1.016	0.11723
1.0185	0.15236
1.021	0.0984
1.0235	0.05101
1.026	0.11358
1.0285	0.10739
1.03099	0.14693
1.03349	0.04645
1.03599	0.0669
1.03849	0.08262
1.04099	0.12401
1.04349	0.17751
1.04599	0.09075
1.04849	0.09535
1.05099	0.01776
1.05349	0.08851
1.05599	0.17481
1.05849	0.18363
1.06099	0.11202
1.06348	0.03384
1.06598	0.10322
1.06848	0.21413
1.07098	0.15307
1.07348	0.11227
1.07598	0.04912
1.07848	0.04637
1.08098	0.11204
1.08348	0.11877
1.08598	0.05989
1.08848	0.10266
1.09098	0.06674
1.09347	0.09758
1.09597	0.12244
1.09847	0.15391
1.10097	0.13176
1.10347	0.14479
1.10597	0.15957
1.10847	0.08226
1.11097	0.05406
1.11347	0.05268
1.11597	0.09663
1.11847	0.08289
1.12097	0.02049
1.12347	0.04793
1.12596	0.07294
1.12846	0.05303
1.13096	0.06941
1.13346	0.10358
1.13596	0.14484
1.13846	0.17961
1.14096	0.05277
1.14346	0.05039
1.14596	0.07891
1.14846	0.02653
1.15096	0.05003
1.15346	0.07619
1.15595	0.02501
1.15845	0.04994
1.16095	0.07645
1.16345	0.07527
1.16595	0.07279
1.16845	0.09922
1.17095	0.12586
1.17345	0.04967
1.17595	0.10442
1.17845	0.09955
1.18095	0.0283
1.18345	0.0257
1.18595	0.02747
1.18844	0.0521
1.19094	0.05165
1.19344	0.10462
1.19594	0.07125
1.19844	0.02611
1.20094	0.0758
1.20344	0.09677
1.20594	0.07123
1.20844	0.02356
1.21094	-6.79857e-07
1.21344	-6.85701e-07
1.21594	-6.91559e-07
1.21843	0.05602
1.22093	0.10189
1.22343	0.07534
1.22593	0.02592
1.22843	0.06014
1.23093	0.07343
1.23343	0.05202
1.23593	0.02459
1.23843	0.00281
1.24093	0.06005
1.24343	0.10052
1.24593	0.06696
1.24843	0.01809
1.25092	0.02791
1.25342	0.01912
1.25592	0.02931
1.25842	0.01964
1.26092	0.03071
1.26342	0.04935
1.26592	0.04899
1.26842	0.05198
1.27092	0.02199
1.27342	0.06297
1.27592	0.03921
1.27842	0.06231
1.28091	0.28967
1.28341	0.213
1.28591	0.16417
1.28841	0.10688
1.29091	0.01867
1.29341	0.03115
1.29591	0.01795
1.29841	0.03131
1.30091	0.05062
1.30341	0.14926
1.30591	0.07181
1.30841	0.03354
1.31091	0.08404
1.3134	0.13489
1.3159	0.05157
1.3184	0.03345
1.3209	0.01755
1.3234	0.000364512
1.3259	0.13525
1.3284	0.09871
1.3309	0.01587
1.3334	-6.51978e-07
1.3359	-6.56267e-07
1.3384	0.13844
1.3409	0.09775
1.34339	0.01559
1.34589	-6.4974e-07
1.34839	0.10576
1.35089	0.08034
1.35339	0.05032
1.35589	0.0873
1.35839	0.06701
1.36089	0.08459
1.36339	0.13634
1.36589	0.04347
1.36839	0.07403
1.37089	0.02897
1.37339	0.000505228
1.37588	0.03676
1.37838	0.08556
1.38088	0.17235
1.38338	0.09142
1.38588	0.05042
1.38838	0.05072
1.39088	0.04887
1.39338	0.04929
1.39588	0.01262
1.39838	0.03749
1.40088	0.01287
1.40338	0.11485
1.40587	0.11322
1.40837	0.09959
1.41087	0.06081
1.41337	0.09043
1.41587	0.06276
1.41837	0.09055
1.42087	0.10209
1.42337	0.02399
1.42587	0.03929
1.42837	0.08954
1.43087	0.02279
1.43337	0.04213
1.43587	0.12751
1.43836	0.06959
1.44086	0.04787
1.44336	0.20877
1.44586	0.20828
1.44836	0.20099
1.45086	0.13796
1.45336	0.15793
1.45586	0.05952
1.45836	0.04478
1.46086	0.0815
1.46336	0.06082
1.46586	0.11417
1.46835	0.10617
1.47085	0.11853
1.47335	0.06282
1.47585	0.10766
1.47835	0.09117
1.48085	0.13509
1.48335	0.07865
1.48585	0.04762
1.48835	0.09482
1.49085	0.13196
1.49335	0.07987
1.49585	0.07108
1.49835	0.10177
1.50084	0.13819
1.50334	0.15531
1.50584	0.05778
1.50834	0.06334
1.51084	0.12333
1.51334	0.04897
1.51584	-0.0014
1.51834	0.04328
1.52084	0.10303
1.52334	0.07928
1.52584	0.04578
1.52834	0.02386
1.53083	0.07049
1.53333	0.10794
1.53583	0.05226
1.53833	0.04968
1.54083	0.06651
1.54333	0.09073
1.54583	0.12439
1.54833	0.13032
1.55083	0.09667
1.55333	0.1436
1.55583	0.17458
1.55833	0.103
1.56083	0.10783
1.56332	0.13464
1.56582	0.09678
1.56832	0.04179
1.57082	0.02493
1.57332	0.02287
1.57582	-0.00467
1.57832	0.04398
1.58082	0.08978
1.58332	0.06756
1.58582	0.07929
1.58832	0.05098
1.59082	-0.000467467
1.59331	0.05564
1.59581	0.12812
1.59831	0.09799
1.60081	0.04989
1.60331	0.07199
1.60581	0.09361
1.60831	0.04204
1.61081	0.08232
1.61331	0.1187
1.61581	0.12574
1.61831	0.15192
1.62081	0.10039
1.62331	0.05547
1.6258	0.13649
1.6283	0.14623
1.6308	0.12703
1.6333	0.06461
1.6358	0.05771
1.6383	0.12394
1.6408	0.16715
1.6433	0.13471
1.6458	0.06936
1.6483	0.10477
1.6508	0.17771
1.6533	0.19937
1.65579	0.0788
1.65829	0.03038
1.66079	0.08671
1.66329	0.16682
1.66579	0.17318
1.66829	0.18174
1.67079	0.20074
1.67329	0.10797
1.67579	0.17449
1.67829	0.24833
1.68079	0.08936
1.68329	0.05403
1.68579	0.1239
1.68828	0.15091
1.69078	0.14877
1.69328	0.14909
1.69578	0.18017
1.69828	0.10301
1.70078	0.14733
1.70328	0.1728
1.70578	0.24891
1.70828	0.25819
1.71078	0.21304
1.71328	0.09961
1.71578	0.08013
1.71827	0.10103
1.72077	0.13733
1.72327	0.08002
1.72577	0.21483
1.72827	0.30435
1.73077	0.23652
1.73327	0.13524
1.73577	0.20488
1.73827	0.17921
1.74077	0.17371
1.74327	0.1262
1.74577	0.10082
1.74827	0.13477
1.75076	0.11318
1.75326	0.05663
1.75576	0.1486
1.75826	0.1992
1.76076	0.13379
1.76326	0.1389
1.76576	0.22355
1.76826	0.13305
1.77076	0.13009
1.77326	0.08173
1.77576	0.08937
1.77826	0.35385
1.78075	0.19399
1.78325	0.21035
1.78575	0.20855
1.78825	0.20075
1.79075	0.05358
1.79325	0.07312
1.79575	0.10055
1.79825	0.09922
1.80075	0.05802
1.80325	0.04394
1.80575	0.12237
1.80825	0.0752
1.81075	0.04821
1.81324	0.01002
1.81574	0.18512
1.81824	0.05952
1.82074	0.08042
1.82324	0.06364
1.82574	0.01419
1.82824	0.07988
1.83074	0.05691
1.83324	0.01163
1.83574	0.04491
1.83824	0.08723
1.84074	0.09468
1.84323	0.0194
1.84573	0.03923
1.84823	0.04503
1.85073	0.09937
1.85323	0.06111
1.85573	0.08849
1.85823	0.06269
1.86073	0.05101
1.86323	0.04701
1.86573	0.01499
1.86823	0.00762
1.87073	0.15327
1.87323	0.06519
1.87572	0.04192
1.87822	0.04493
1.88072	0.01652
1.88322	0.00452
1.88572	0.1274
1.88822	0.04643
1.89072	0.01673
1.89322	0.10446
1.89572	0.07341
1.89822	0.0106
1.90072	0.03127
1.90322	0.03457
1.90571	0.00564
1.90821	0.13118
1.91071	0.05791
1.91321	0.0704
1.91571	0.04347
1.91821	0.13604
1.92071	0.14352
1.92321	0.01846
1.92571	0.000171437
1.92821	0.08512
1.93071	0.15902
1.93321	0.11947
1.93571	0.13566
1.9382	0.02107
1.9407	0.000750538
1.9432	0.04396
1.9457	0.07729
1.9482	0.04507
1.9507	0.05359
1.9532	0.07852
1.9557	0.14646
1.9582	0.14702
1.9607	0.15546
1.9632	0.01216
1.9657	0.02513
1.96819	0.03262
1.97069	0.13567
1.97319	0.13821
1.97569	0.04888
1.97819	0.03903
1.98069	0.0568
1.98319	0.00735
1.98569	0.00878
1.98819	0.07899
1.99069	0.00402
1.99319	0.072
1.99569	0.03112
1.99819	0.04888
2.00068	0.03903
2.00318	0.0568
2.00568	0.00735
2.00818	0.00878
2.01068	0.07899
2.01318	0.00402
2.01568	0.072
2.01818	0.03732
2.02068	0.35522
2.02318	0.26073
2.02568	0.20568
2.02818	0.15464
2.03067	0.06044
2.03317	1.45154e-06
2.03567	-1.02788e-07
2.03817	4.54269e-05
2.04067	8.98656e-06
2.04317	-1.03459e-07
2.04567	-1.03688e-07
2.04817	1.06955e-07
2.05067	9.69352e-06
2.05317	4.65959e-05
2.05567	4.57388e-05
2.05817	0.04976
2.06067	0.04975
2.06316	-1.02012e-07
2.06566	5.4018e-05
2.06816	0.04976
2.07066	-1.01065e-07
2.07316	-1.01307e-07
2.07566	-1.01554e-07
2.07816	0.09951
2.08066	-9.8709e-08
2.08316	-9.8948e-08
2.08566	-9.919e-08
2.08816	-9.9434e-08
2.09066	7.0981e-08
2.09315	4.30653e-06
2.09565	-1.00186e-07
2.09815	-1.00442e-07
2.10065	7.77514e-06
2.10315	4.64082e-05
2.10565	-1.01226e-07
2.10815	-1.01494e-07
2.11065	0.04975
2.11315	-1.00369e-07
2.11565	-9.2905e-08
2.11815	0.04975
2.12065	4.50222e-05
2.12315	0.04975
2.12564	5.19731e-06
2.12814	0.10872
2.13064	0.06009
2.13314	0.01074
2.13564	0.03977
2.13814	0.01104
2.14064	0.04023
2.14314	0.0111
2.14564	-8.17068e-07
2.14814	0.03817
2.15064	0.01098
2.15314	0.07776
2.15563	0.1001
2.15813	0.02306
2.16063	0.03848
2.16313	0.05
2.16563	0.04947
2.16813	0.0881
2.17063	0.0622
2.17313	1.45154e-06
2.17563	-1.02788e-07
2.17813	4.54269e-05
2.18063	8.98656e-06
2.18313	-1.03459e-07
2.18563	-1.03688e-07
2.18812	1.06955e-07
2.19062	9.69352e-06
2.19312	4.65959e-05
2.19562	4.57388e-05
2.19812	0.04976
2.20062	0.04975
2.20312	-1.02012e-07
2.20562	5.4018e-05
2.20812	0.04976
2.21062	-1.01065e-07
2.21312	-1.01307e-07
2.21562	-1.01554e-07
2.21811	0.09951
2.22061	-9.8709e-08
2.22311	-9.8948e-08
2.22561	-9.919e-08
2.22811	-9.9434e-08
2.23061	7.0981e-08
2.23311	4.30653e-06
2.23561	-1.00186e-07
2.23811	-1.00442e-07
2.24061	7.77514e-06
2.24311	4.64082e-05
2.24561	-1.01226e-07
2.24811	-1.01494e-07
2.2506	0.04975
2.2531	-1.00369e-07
2.2556	-9.2905e-08
2.2581	0.04975
2.2606	4.50222e-05
2.2631	0.04975
2.2656	5.19731e-06
2.2681	0.2728
2.2706	0.10445
2.2731	0.2594
2.2756	0.13549
2.2781	0.09891
2.28059	0.11364
2.28309	0.14738
2.28559	0.1123
2.28809	0.06038
2.29059	0.07459
2.29309	0.03269
2.29559	0.11494
2.29809	0.13441
2.30059	0.11693
2.30309	0.10993
2.30559	0.04714
2.30809	0.17249
2.31059	0.15489
2.31308	0.0647
2.31558	0.06647
2.31808	0.03124
2.32058	0.10046
2.32308	0.09561
2.32558	0.06524
2.32808	0.0475
2.33058	0.18261
2.33308	0.20297
2.33558	0.06938
2.33808	0.03547
2.34058	0.13295
2.34307	0.20055
2.34557	0.23717
2.34807	0.23751
2.35057	0.10018
2.35307	0.11723
2.35557	0.15236
2.35807	0.0984
2.36057	0.05101
2.36307	0.11358
2.36557	0.10739
2.36807	0.14693
2.37057	0.04645
2.37307	0.0669
2.37556	0.08262
2.37806	0.12401
2.38056	0.17751
2.38306	0.09075
2.38556	0.09535
2.38806	0.01776
2.39056	0.08851
2.39306	0.17481
2.39556	0.18363
2.39806	0.11202
2.40056	0.03384
2.40306	0.10322
2.40555	0.21413
2.40805	0.15307
2.41055	0.11227
2.41305	0.04912
2.41555	0.04637
2.41805	0.11204
2.42055	0.11877
2.42305	0.05989
2.42555	0.10266
2.42805	0.06674
2.43055	0.09758
2.43305	0.12244
2.43555	0.15391
2.43804	0.13176
2.44054	0.14479
2.44304	0.15957
2.44554	0.08226
2.44804	0.05406
2.45054	0.05268
2.45304	0.09663
2.45554	0.08289
2.45804	0.02049
2.46054	0.04793
2.46304	0.07294
2.46554	0.05303
2.46803	0.06941
2.47053	0.10358
2.47303	0.14484
2.47553	0.17961
2.47803	0.05277
2.48053	0.05039
2.48303	0.07891
2.48553	0.02653
2.48803	0.05003
2.49053	0.07619
2.49303	0.02501
2.49553	0.04994
2.49803	0.07645
2.50052	0.07527
2.50302	0.07279
2.50552	0.09922
2.50802	0.12586
2.51052	0.04967
2.51302	0.10442
2.51552	0.09955
2.51802	0.0283
2.52052	0.0257
2.52302	0.02747
2.52552	0.0521
2.52802	0.05165
2.53051	0.10462
2.53301	0.07125
2.53551	0.02611
2.53801	0.0758
2.54051	0.09677
2.54301	0.07123
2.54551	0.02356
2.54801	-6.79857e-07
2.55051	-6.85701e-07
2.55301	-6.91559e-07
2.55551	0.05602
2.55801	0.10189
2.56051	0.07534
2.563	0.02592
2.5655	0.06014
2.568	0.07343
2.5705	0.05202
2.573	0.02459
2.5755	0.00281
2.578	0.06005
2.5805	0.10052
2.583	0.06696
2.5855	0.01809
2.588	0.02791
2.5905	0.01912
2.59299	0.02931
2.59549	0.01964
2.59799	0.03071
2.60049	0.04935
2.60299	0.04899
2.60549	0.05198
2.60799	0.02199
2.61049	0.06297
2.61299	0.03921
2.61549	0.06231
2.61799	0.28967
2.62049	0.213
2.62299	0.16417
2.62548	0.10688
2.62798	0.01867
2.63048	0.03115
2.63298	0.01795
2.63548	0.03131
2.63798	0.05062
2.64048	0.14926
2.64298	0.07181
2.64548	0.03354
2.64798	0.08404
2.65048	0.13489
2.65298	0.05157
2.65547	0.03345
2.65797	0.01755
2.66047	0.000364512
2.66297	0.13525
2.66547	0.09871
2.66797	0.01587
2.67047	-6.51978e-07
2.67297	-6.56267e-07
2.67547	0.13844
2.67797	0.09775
2.68047	0.01559
2.68297	-6.4974e-07
2.68547	0.10576
2.68796	0.08034
2.69046	0.05032
2.69296	0.0873
2.69546	0.06701
2.69796	0.08459
2.70046	0.13634
2.70296	0.04347
2.70546	0.07403
2.70796	0.02897
2.71046	0.000505228
2.71296	0.03676
2.71546	0.08556
2.71795	0.17235
2.72045	0.09142
2.72295	0.05042
2.72545	0.05072
2.72795	0.04887
2.73045	0.04929
2.73295	0.01262
2.73545	0.03749
2.73795	0.01287
2.74045	0.11485
2.74295	0.11322
2.74545	0.09959
2.74795	0.06081
2.75044	0.09043
2.75294	0.06276
2.75544	0.09055
2.75794	0.10209
2.76044	0.02399
2.76294	0.03929
2.76544	0.08954
2.76794	0.02279
2.77044	0.04213
2.77294	0.12751
2.77544	0.06959
2.77794	0.04787
2.78043	0.20877
2.78293	0.20828
2.78543	0.20099
2.78793	0.04002
2.79043	0.04074
2.79293	0.04629
2.79543	0.0917
2.79793	0.02084
2.80043	0.04145
2.80293	0.0515
2.80543	0.09392
2.80793	0.05975
2.81043	0.00869
2.81292	0.000214639
2.81542	0.04295
2.81792	0.05156
2.82042	0.09013
2.82292	0.05809
2.82542	0.00789
2.82792	0.04117
2.83042	0.05072
2.83292	0.00847
2.83542	0.000157511
2.83792	0.0854
2.84042	0.01391
2.84291	0.04329
2.84541	0.0071
2.84791	0.000527832
2.85041	0.08833
2.85291	0.05545
2.85541	0.04904
2.85791	0.05146
2.86041	0.09585
2.86291	0.05543
2.86541	0.00572
2.86791	0.04697
2.87041	0.13888
2.87291	0.15081
2.8754	0.06127
2.8779	0.09695
2.8804	0.05253
2.8829	0.00446
2.8854	0.04665
2.8879	0.05094
2.8904	0.04444
2.8929	0.09675
2.8954	0.0552
2.8979	0.00405
2.9004	0.09189
2.9029	0.05492
2.90539	0.09827
2.90789	0.00692
2.91039	0.09388
2.91289	0.19692
2.91539	0.01308
2.91789	0.04613
2.92039	0.00311
2.92289	0.04698
2.92539	0.05047
2.92789	0.00236
2.93039	0.04849
2.93289	0.05134
2.93539	0.0508
2.93788	0.05065
2.94038	0.05122
2.94288	0.00157
2.94538	0.00042512
2.94788	0.09876
2.95038	0.0023
2.95288	0.05019
2.95538	0.05011
2.95788	0.04913
2.96038	0.000594897
2.96288	0.09843
2.96538	0.05143
2.96787	0.000211518
2.97037	7.76789e-07
2.97287	0.000342467
2.97537	0.000367288
2.97787	1.62887e-05
2.98037	0.00212
2.98287	0.05104
2.98537	0.15122
2.98787	0.09841
2.99037	0.05245
2.99287	0.09749
2.99537	0.04884
2.99787	0.00171
3.00036	0.05345
3.00286	0.0976
3.00536	-5.42612e-07
3.00786	0.00441
3.01036	0.09623
3.01286	0.000866045
3.01536	0.00377
3.01786	0.05708
3.02036	0.14364
3.02286	0.00625
3.02536	0.10024
3.02786	0.09495
3.03035	0.00751
3.03285	0.09769
3.03535	0.05435
3.03785	0.09854
3.04035	0.09629
3.04285	0.05161
3.04535	0.09638
3.04785	0.04636
3.05035	0.000352411
3.05285	0.00474
3.05535	0.05074
3.05785	0.04434
3.06035	0.00501
3.06284	0.05048
3.06534	0.0569
3.06784	0.09036
3.07034	-5.78847e-07
3.07284	0.0227
3.07534	0.17804
3.07784	-5.83672e-07
3.08034	0.000223328
3.08284	0.00176
3.08534	0.00701
3.08784	0.04837
3.09034	0.04428
3.09283	0.01461
3.09533	0.08783
3.09783	0.000268857
3.10033	0.00753
3.10283	0.04352
3.10533	-6.52983e-07
3.10783	0.000114627
3.11033	0.000650637
3.11283	0.00758
3.11533	0.05648
3.11783	0.08998
3.12033	0.04231
3.12283	9.59647e-05
3.12532	0.01728
3.12782	0.09263
3.13032	0.06012
3.13282	0.09258
3.13532	0.05897
3.13782	0.08336
3.14032	0.00161
3.14282	0.01034
3.14532	0.04038
3.14782	0.01953
3.15032	0.07978
3.15282	0.0099
3.15531	0.04986
3.15781	0.04925
3.16031	0.06022
3.16281	0.10049
3.16531	0.08817
3.16781	0.03989
3.17031	0.01104
3.17281	0.07305
3.17531	0.12914
3.17781	0.05033
3.18031	0.05057
3.18281	0.06202
3.18531	0.09967
3.1878	0.07664
3.1903	0.000303727
3.1928	0.03756
3.1953	0.11522
3.1978	0.04942
3.2003	0.20125
3.2028	0.16357
3.2053	0.03773
3.2078	0.000571368
3.2103	0.01332
3.2128	0.0365
3.2153	0.01274
3.21779	0.0751
3.22029	0.12401
3.22279	0.03691
3.22529	0.01373
3.22779	0.03575
3.23029	2.22694e-05
3.23279	0.000192873
3.23529	0.02936
3.23779	0.07207
3.24029	0.01513
3.24279	0.05088
3.24529	0.03558
3.24779	0.0305
3.25028	0.0701
3.25278	0.04617
3.25528	0.12026
3.25778	0.03439
3.26028	0.01578
3.26278	0.03464
3.26528	0.0319
3.26778	0.10049
3.27028	0.08361
3.27278	0.06504
3.27528	0.06715
3.27778	9.9861e-05
3.28027	0.01674
3.28277	0.06702
3.28527	0.10091
3.28777	0.08274
3.29027	0.05006
3.29277	0.08361
3.29527	0.11758
3.29777	0.05056
3.30027	0.05047
3.30277	0.03354
3.30527	0.000174294
3.30777	0.04788
3.31027	0.13329
3.31276	0.08412
3.31526	0.06621
3.31776	0.10007
3.32026	0.11439
3.32276	0.14939
3.32526	0.13498
3.32776	0.07008
3.33026	0.03003
3.33276	0.07055
3.33526	0.01516
3.33776	0.04978
3.34026	0.04918
3.34275	0.06425
3.34525	0.11522
3.34775	0.12201
3.35025	0.04995
3.35275	0.03596
3.35525	0.02772
3.35775	0.07251
3.36025	0.0131
3.36275	0.03521
3.36525	0.01384
3.36775	0.03673
3.37025	4.32575e-06
3.37275	0.01308
3.37524	0.03712
3.37774	0.01312
3.38024	0.06283
3.38274	0.11297
3.38524	0.11364
3.38774	0.000734966
3.39024	0.01191
3.39274	0.0367
3.39524	3.21306e-06
3.39774	0.01205
3.40024	0.05014
3.40274	0.03774
3.40523	-2.79282e-06
3.40773	-2.82802e-06
3.41023	6.02734e-05
3.41273	0.000371981
3.41523	0.000604122
3.41773	0.000191206
3.42023	0.01104
3.42273	0.05022
3.42523	0.05997
3.42773	0.10031
3.43023	0.0796
3.43273	0.01068
3.43523	0.04034
3.43772	0.00992
3.44022	0.03916
3.44272	-3.30612e-06
3.44522	-3.34288e-06
3.44772	0.00984
3.45022	0.06944
3.45272	0.12016
3.45522	0.00942
3.45772	0.05052
3.46022	0.04158
3.46272	7.22231e-05
3.46522	0.01798
3.46771	0.08182
3.47021	0.000531318
3.47271	0.00108
3.47521	0.0086
3.47771	0.04247
3.48021	0.00809
3.48271	0.06532
3.48521	0.13272
3.48771	0.04251
3.49021	0.01611
3.49271	0.09359
3.49521	0.06514
3.49771	0.13328
3.5002	0.04243
3.5027	0.000182472
3.5052	0.00111
3.5077	-4.09797e-06
3.5102	0.03435
3.5127	0.22986
3.5152	0.08575
3.5177	-4.17221e-06
3.5202	0.000118997
3.5227	0.00709
3.5252	0.04355
3.5277	0.01192
3.53019	0.09257
3.53269	0.05667
3.53519	0.09443
3.53769	0.04395
3.54019	0.000663954
3.54269	0.01172
3.54519	0.10037
3.54769	0.09468
3.55019	0.04477
3.55269	0.01003
3.55519	0.0953
3.55769	0.05351
3.56019	0.09097
3.56268	0.00448
3.56518	0.04987
3.56768	0.04556
3.57018	-4.32694e-06
3.57268	0.00802
3.57518	0.09536
3.57768	0.04608
3.58018	0.00754
3.58268	0.10531
3.58518	0.14645
3.58768	0.09365
3.59018	0.00974
3.59267	0.14047
3.59517	0.00907
3.59767	0.14995
3.60017	0.14513
3.60267	0.05317
3.60517	0.10526
3.60767	0.18949
3.61017	0.05353
3.61267	0.15644
3.61517	0.29598
3.61767	0.20235
3.62017	0.25231
3.62267	0.29498
3.62516	0.15263
3.62766	0.24894
3.63016	0.26148
3.63266	0.64046
3.63516	0.24907
3.63766	0.20085
3.64016	0.20473
3.64266	0.4528
3.64516	0.64874
3.64766	0.64613
3.65016	0.45203
3.65266	0.70062
3.65515	0.74994
3.65765	0.79969
3.66015	0.79892
3.66265	0.84801
3.66515	0.9001
3.66765	0.79918
3.67015	0.8998
3.67265	0.8006
3.67515	1.29618
3.67765	0.7053
3.68015	0.99647
3.68265	1.54152
3.68515	1.20582
3.68764	1.05316
3.69014	1.29447
3.69264	1.10433
3.69514	0.95308
3.69764	1.24099
3.70014	0.86135
3.70264	1.09128
3.70514	1.05016
3.70764	1.33681
3.71014	1.30058
3.71264	1.29905
3.71514	1.05956
3.71763	1.19284
3.72013	1.05734
3.72263	1.0494
3.72513	0.7179
3.72763	1.4085
3.73013	0.69545
3.73263	1.07339
3.73513	0.86437
3.73763	1.0366
3.74013	0.95623
3.74263	0.90184
3.74513	0.94394
3.74763	0.7638
3.75012	0.24105
3.75262	0.61434
3.75512	0.46548
3.75762	0.40395
3.76012	0.26263
3.76262	0.47813
3.76512	0.49957
3.76762	0.54581
3.77012	0.41485
3.77262	0.30982
3.77512	0.38992
3.77762	0.39918
3.78011	0.17533
3.78261	0.37319
3.78511	0.35522
3.78761	0.26073
3.79011	0.20568
3.79261	0.15464
3.79511	0.06044
3.79761	0.13718
3.80011	0.23796
3.80261	0.16244
3.80511	0.10645
3.80761	0.09947
3.81011	0.14293
3.8126	0.06299
3.8151	0.04925
3.8176	0.13678
3.8201	0.0211
3.8226	0.12921
3.8251	0.14945
3.8276	0.14967
3.8301	0.10669
3.8326	0.18533
3.8351	0.07236
3.8376	0.04994
3.8401	0.09234
3.84259	0.01587
3.84509	0.08413
3.84759	0.05842
3.85009	0.04988
3.85259	0.05045
3.85509	0.00892
3.85759	6.90295e-05
3.86009	0.16517
3.86259	0.0353
3.86509	6.94391e-05
3.86759	0.000774041
3.87009	0.000169045
3.87259	0.03996
3.87508	0.08986
3.87758	0.0586
3.88008	0.12864
3.88258	0.14995
3.88508	0.06984
3.88758	0.05027
3.89008	0.13002
3.89258	0.10872
3.89508	0.06009
3.89758	0.01074
3.90008	0.03977
3.90258	0.01104
3.90507	0.04023
3.90757	0.0111
3.91007	-8.17068e-07
3.91257	0.03817
3.91507	0.01098
3.91757	0.07776
3.92007	0.1001
3.92257	0.02306
3.92507	0.03848
3.92757	0.05
3.93007	0.04947
3.93257	0.0881
3.93507	0.0622
3.93756	0.05026
3.94006	0.08817
3.94256	0.06252
3.94506	0.04991
3.94756	0.05007
3.95006	0.0128
3.95256	0.14822
3.95506	0.0885
3.95756	0.12313
3.96006	0.07619
3.96256	0.04988
3.96506	0.01342
3.96755	0.10919
3.97005	0.0775
3.97255	0.08588
3.97505	0.02803
3.97755	0.10812
3.98005	0.07853
3.98255	0.12112
3.98505	0.25651
3.98755	0.19316
3.99005	0.18532
3.99255	0.19988
3.99505	0.09388
3.99755	0.01471
4.00004	0.10424
4.00254	0.21907
4.00504	0.1103
4.00754	0.2229
4.01004	0.1274
4.01254	0.15301
4.01504	0.30249
4.01754	0.21317
4.02004	0.14973
4.02254	0.18407
4.02504	0.16649
4.02754	0.1502
4.03003	0.31818
4.03253	0.26535
4.03503	0.16606
4.03753	0.11647
4.04003	0.09977
4.04253	0.16536
4.04503	0.16634
4.04753	0.11647
4.05003	0.22985
4.05253	0.10401
4.05503	0.12873
4.05753	0.10225
4.06003	0.11454
4.06252	0.11797
4.06502	0.10019
4.06752	0.16393
4.07002	0.19947
4.07252	0.16801
4.07502	0.08658
4.07752	0.08143
4.08002	0.06893
4.08252	0.05032
4.08502	0.11231
4.08752	0.11835
4.09002	0.09906
4.09251	0.06849
4.09501	0.08079
4.09751	0.10028
4.10001	0.03929
4.10251	0.03009
4.10501	0.11004
4.10751	0.17969
4.11001	0.07977
4.11251	0.02997
4.11501	0.0799
4.11751	0.10009
4.12001	0.0696
4.12251	0.01995
4.125	0.02926
4.1275	0.02074
4.13	0.02922
4.1325	0.07904
4.135	0.10007
4.1375	0.04261
4.14	0.000100883
4.1425	0.02869
4.145	0.02196
4.1475	0.000471825
4.15	0.000262084
4.1525	0.02816
4.15499	0.04968
4.15749	0.02197
4.15999	0.05514
4.16249	0.07204
4.16499	0.02249
4.16749	0.05428
4.16999	0.12629
4.17249	0.12226
4.17499	0.12691
4.17749	0.09603
4.17999	0.0233
4.18249	0.000108518
4.18499	0.02665
4.18748	0.02352
4.18998	3.88997e-06
4.19248	0.000176926
4.19498	0.000387695
4.19748	0.02628
4.19998	0.04957
4.20248	0.04952
4.20498	0.07524
4.20748	0.04854
4.20998	0.02565
4.21248	0.0247
4.21498	0.02535
4.21747	0.02487
4.21997	0.02469
4.22247	0.0496
4.22497	0.05003
4.22747	0.02548
4.22997	0.000254946
4.23247	0.000153064
4.23497	-2.9194e-07
4.23747	0.0242
4.23997	0.04984
4.24247	0.02591
4.24497	0.02406
4.24747	0.04995
4.24996	0.07358
4.25246	0.05292
4.25496	8.16801e-05
4.25746	0.02315
4.25996	0.02664
4.26246	0.000318564
4.26496	0.000156128
4.26746	0.04589
4.26996	0.05444
4.27246	0.02265
4.27496	0.02742
4.27746	0.02223
4.27995	0.0274
4.28245	0.0225
4.28495	0.02824
4.28745	0.06551
4.28995	0.08376
4.29245	0.02149
4.29495	0.0494
4.29745	0.04971
4.29995	0.07152
4.30245	0.05745
4.30495	0.000311549
4.30745	0.000424872
4.30995	-2.76557e-07
4.31244	0.000185488
4.31494	0.000345879
4.31744	0.000171813
4.31994	7.2207e-05
4.32244	0.000101651
4.32494	0.000148017
4.32744	0.02
4.32994	0.08943
4.33244	0.10927
4.33494	0.06986
4.33744	0.06104
4.33994	0.01968
4.34243	0.08868
4.34493	0.09173
4.34743	0.01902
4.34993	0.0495
4.35243	0.03088
4.35493	6.68554e-05
4.35743	0.01877
4.35993	0.03118
4.36243	0.01833
4.36493	0.0495
4.36743	0.04949
4.36993	0.03097
4.37243	0.000214675
4.37492	0.000352683
4.37742	0.01816
4.37992	0.0322
4.38242	0.01777
4.38492	0.03245
4.38742	-2.67046e-07
4.38992	5.42548e-05
4.39242	0.000197926
4.39492	0.000375944
4.39742	0.000373959
4.39992	0.01675
4.40242	0.03287
4.40491	-2.73709e-07
4.40741	0.01652
4.40991	0.03344
4.41241	0.0164
4.41491	0.03383
4.41741	0.0162
4.41991	0.04988
4.42241	0.04948
4.42491	0.03393
4.42741	0.000274773
4.42991	0.03112
4.43241	0.06909
4.43491	0.01529
4.4374	0.03471
4.4399	0.00010003
4.4424	0.000248882
4.4449	0.02999
4.4474	0.06985
4.4499	8.43002e-05
4.4524	0.000204275
4.4549	0.01436
4.4574	0.03552
4.4599	3.59745e-05
4.4624	0.0141
4.4649	0.04982
4.46739	0.03566
4.46989	0.0131
4.47239	0.03461
4.47489	0.01352
4.47739	0.04989
4.47989	0.03655
4.48239	0.000241306
4.48489	4.95161e-05
4.48739	0.000205732
4.48989	0.000186027
4.49239	0.01274
4.49489	0.05005
4.49739	0.03784
4.49988	0.01315
4.50238	0.03788
4.50488	6.24928e-05
4.50738	2.50496e-05
4.50988	0.000116049
4.51238	0.000116125
4.51488	-2.77488e-07
4.51738	7.71428e-05
4.51988	0.02324
4.52238	0.08851
4.52488	0.06093
4.52738	0.08809
4.52987	0.06064
4.53237	0.07804
4.53487	-2.65955e-07
4.53737	5.33606e-06
4.53987	0.03177
4.54237	0.11842
4.54487	0.000105544
4.54737	0.01012
4.54987	0.03935
4.55237	0.000195312
4.55487	-2.64781e-07
4.55737	0.00978
4.55987	0.04023
4.56236	0.00971
4.56486	0.04057
4.56736	0.01869
4.56986	0.0814
4.57236	8.84805e-05
4.57486	0.0091
4.57736	0.04121
4.57986	3.61245e-05
4.58236	0.000199863
4.58486	0.00867
4.58736	0.04982
4.58986	0.0497
4.59235	0.04119
4.59485	0.000129806
4.59735	1.24102e-06
4.59985	0.00772
4.60235	0.04902
4.60485	0.04225
4.60735	0.000148236
4.60985	0.00741
4.61235	0.0498
4.61485	0.04268
4.61735	0.00732
4.61985	0.04308
4.62235	3.28096e-05
4.62484	0.000216199
4.62734	0.01338
4.62984	0.09365
4.63234	0.04347
4.63484	2.39714e-07
4.63734	0.02473
4.63984	0.17529
4.64234	2.43408e-05
4.64484	3.80548e-07
4.64734	0.00569
4.64984	0.04388
4.65234	1.68236e-05
4.65483	0.00547
4.65733	0.04407
4.65983	-2.55157e-07
4.66233	-2.56279e-07
4.66483	0.00488
4.66733	0.0445
4.66983	0.00475
4.67233	0.04539
4.67483	5.05013e-05
4.67733	0.000335321
4.67983	1.83686e-05
4.68233	1.4335e-05
4.68483	0.000160789
4.68732	2.36776e-07
4.68982	0.00384
4.69232	0.05009
4.69482	0.04662
4.69732	2.45922e-05
4.69982	0.000159166
4.70232	0.00322
4.70482	0.04932
4.70732	0.04991
4.70982	0.05039
4.71232	0.04706
4.71482	0.00806
4.71731	0.14427
4.71981	0.04685
4.72231	-1.19962e-07
4.72481	0.00669
4.72731	0.1426
4.72981	0.00405
4.73231	0.09605
4.73481	0.00175
4.73731	0.0471
4.73981	0.00313
4.74231	0.09694
4.74481	0.00158
4.74731	0.04884
4.7498	-2.45426e-07
4.7523	0.00201
4.7548	0.09915
4.7573	0.04903
4.7598	9.405e-09
4.7623	2.50433e-05
4.7648	0.00059143
4.7673	9.06958e-06
4.7698	-2.4694e-07
4.7723	-2.48125e-07
4.7748	-2.49315e-07
4.7773	-2.50512e-07
4.77979	0.00037991
4.78229	6.87948e-07
4.78479	0.000199867
4.78729	0.09894
4.78979	0.00109
4.79229	0.09796
4.79479	0.00137
4.79729	-1.73705e-07
4.79979	0.000164899
4.80229	3.20126e-06
4.80479	0.000336809
4.80729	0.04761
4.80979	0.04998
4.81228	0.04935
4.81478	0.00175
4.81728	6.24557e-06
4.81978	0.000195411
4.82228	0.04791
4.82478	0.00217
4.82728	0.04785
4.82978	0.05001
4.83228	0.00238
4.83478	0.000574666
4.83728	0.0944
4.83978	0.00559
4.84227	1.04568e-05
4.84477	0.000157146
4.84727	9.974e-06
4.84977	2.08565e-06
4.85227	0.000147786
4.85477	0.04599
4.85727	0.09566
4.85977	0.00736
4.86227	0.04561
4.86477	0.05015
4.86727	0.09569
4.86977	0.0083
4.87227	0.000177143
4.87476	0.000167831
4.87726	1.45253e-05
4.87976	-2.51905e-07
4.88226	0.00018473
4.88476	0.04528
4.88726	0.00486
4.88976	0.000154679
4.89226	1.72556e-05
4.89476	0.04463
4.89726	0.00529
4.89976	0.04398
4.90226	0.00547
4.90475	3.84932e-06
4.90725	0.04424
4.90975	0.04981
4.91225	0.00597
4.91475	0.08762
4.91725	0.01241
4.91975	0.08731
4.92225	0.01289
4.92475	1.61004e-06
4.92725	0.000130485
4.92975	2.02073e-05
4.93225	4.53548e-06
4.93475	0.04278
4.93724	0.04977
4.93974	0.04977
4.94224	0.00731
4.94474	8.60755e-06
4.94724	0.04235
4.94974	0.00767
4.95224	0.00016578
4.95474	0.000161481
4.95724	0.000147081
4.95974	4.68017e-05
4.96224	0.04176
4.96474	0.00852
4.96723	0.08292
4.96973	0.01741
4.97223	7.24074e-05
4.97473	3.20763e-06
4.97723	0.04105
4.97973	0.00903
4.98223	0.04032
4.98473	0.00914
4.98723	-2.56169e-07
4.98973	-2.57262e-07
4.99223	-2.58361e-07
4.99473	-2.59469e-07
4.99723	-2.60583e-07
[truncated: 2,000 more rows]
