# Supplementary material for: Swelling Pressure of Double‐Expansive Material and Its Active Support Effect for Coal Seam Gas Drainage Borehole
Source: Hindawi journal article supplement (doi:10.1155/2018/8245036), 2018-01-01
Supplement: f1 [file 8245036.f1.zip › Field tests data.xls]

## Sheet: Sheet1
Drainage time / day	Gas Concentration in Group 1	Gas Concentration in Group 2
1	48	47
3	48	44.5
4	48.3	43
6	46	31
7	44	29
8	45	26
10	43	26
11	44	22
13	48	19
14	42	17
16	42	15.5
17	40	14.5
19	39	15.5
22	39.8	13.5
24	38	13
26	37	13.5
28	36.6	13
32	36	10
34	36	9
35	35	8
37	36	7
39	35.5	7
41	33	7
43	33	6
46	32	4.8
48	30	4.5
50	30	4
