# Supplementary material for: Swelling Pressure of Double‐Expansive Material and Its Active Support Effect for Coal Seam Gas Drainage Borehole
Source: Hindawi journal article supplement (doi:10.1155/2018/8245036), 2018-01-01
Supplement: f1 [file 8245036.f1.zip › RSPI calculation results.xls]

## Sheet: Sheet1
	At initial swelling stage / 10-4J	At secondary swelling stage / 10-4J
Test No.1	0.14713	12.5809
Test No.2	0.15528	13.7935
Test No.3	0.4207	22.4425
Test No.4	0.72365	23.2894
