# Supplementary material for: Swelling Pressure of Double‐Expansive Material and Its Active Support Effect for Coal Seam Gas Drainage Borehole
Source: Hindawi journal article supplement (doi:10.1155/2018/8245036), 2018-01-01
Supplement: f1 [file 8245036.f1.zip › Test No.1 data.xls]

## Sheet: Sheet1
TIME / HOUR	AXIAL SWELLING PRESSURTE / MPa	RADIAL SWELLING PRESSURTE / MPa
0	0	0
1	5.14e-05	6.425e-05
2	0.00756	0.00945
3	0.00999	0.01249
4	0.00999	0.01249
5	0.00645	0.00807
6	0.00383	0.00478
7	0.00777	0.00971
8	0.00777	0.00971
9	0.00908	0.01135
10	0.00908	0.01135
11	0.01039	0.01299
12	0.01892	0.02365
13	0.02559	0.03199
14	0.03022	0.03777
15	0.03928	0.0491
16	0.043	0.05375
17	0.06393	0.07991
18	0.09141	0.11427
19	0.12615	0.15768
20	0.15411	0.19264
21	0.17974	0.22467
22	0.19168	0.2396
23	0.23874	0.29843
24	0.25409	0.31761
25	0.29745	0.37181
26	0.31629	0.39536
27	0.34773	0.43466
28	0.36891	0.46114
29	0.3942	0.49275
30	0.42117	0.56312
31	0.41196	0.60424
32	0.45589	0.62176
33	0.48215	0.6371
34	0.4867	0.64863
35	0.4967	0.65601
36	0.50387	0.66139
37	0.51296	0.71323
38	0.52154	0.68794
39	0.52609	0.69446
40	0.53063	0.7032
41	0.54671	0.7264
42	0.54735	0.7361
43	0.55235	0.74104
44	0.55689	0.7582
45	0.57002	0.7641
46	0.57002	0.7758
47	0.5746	0.81096
48	0.58315	0.82238
49	0.59628	0.85649
50	0.60723	0.87414
51	0.62708	0.91021
52	0.64021	0.91629
53	0.6612	0.91749
54	0.6734	0.9293
55	0.7563	0.93773
56	0.67556	0.9531
57	0.68415	0.96361
58	0.70182	0.9974
59	0.73717	1.0065
60	0.7503	1.02865
61	0.77202	1.03997
62	0.79316	1.05383
63	0.80736	1.05921
64	0.81595	1.06114
65	0.83817	1.07032
66	0.83817	1.07453
67	0.85988	1.08764
68	0.87756	1.12506
69	0.89069	1.10929
70	0.90701	1.12632
71	0.90836	1.13653
72	0.91476	1.14774
73	0.92604	1.18461
74	0.94371	1.20319
75	0.9523	1.22641
76	0.96139	1.25437
77	0.96997	1.25865
78	0.97856	1.30598
79	0.99623	1.34072
80	1.00532	1.37031
81	1.0139	1.4013
82	1.03158	1.42577
83	1.04925	1.4372
84	1.05329	1.439
85	1.06642	1.4479
86	1.08006	1.4503
87	1.08723	1.4596
88	1.09723	1.45874
89	1.09723	1.45978
90	1.14571	1.48123
91	1.14963	1.4896
92	1.15025	1.4921
93	1.16793	1.4965
94	1.1851	1.49801
95	1.18106	1.49823
96	1.18973	1.51358
97	1.21186	1.51934
98	1.21186	1.5243
99	1.2467	1.52411
100	1.2526	1.55369
101	1.2631	1.55424
102	1.26892	1.5596
103	1.27347	1.563
104	1.27751	1.57313
105	1.28205	1.57593
106	1.29064	1.59081
107	1.2874	1.56646
108	1.30831	1.56383
109	1.32144	1.57082
110	1.30831	1.57913
111	1.3113	1.58014
112	1.31186	1.58903
113	1.31286	1.5825
114	1.30377	1.58275
115	1.30377	1.57229
116	1.30831	1.58924
117	1.33053	1.56981
118	1.33457	1.5772
119	1.33912	1.57678
120	1.33457	1.5681
121	1.33053	1.58577
122	1.3318	1.56339
123	1.32599	1.58737
124	1.3174	1.56598
125	1.3174	1.58183
126	1.32599	1.56954
127	1.33912	1.56998
128	1.3397	1.59034
129	1.34366	1.5641
130	1.34793	1.56341
131	1.35679	1.58432
132	1.36134	1.56567
133	1.37851	1.58507
134	1.38305	1.57934
135	1.37447	1.5681
136	1.34963	1.57943
137	1.35103	1.58599
138	1.35225	1.5639
139	1.35274	1.58345
140	1.34821	1.58389
141	1.36134	1.56748
142	1.36134	1.56796
143	1.34821	1.57725
144	1.37447	1.58783
145	1.33457	1.57476
146	1.33912	1.58477
147	1.32793	1.56774
148	1.36134	1.58562
149	1.37599	1.56916
150	1.35225	1.58246
151	1.36992	1.5764
152	1.3174	1.56613
153	1.33053	1.58229
154	1.35679	1.57444
155	1.36134	1.58299
156	1.33912	1.59149
157	1.34366	1.56725
158	1.33457	1.57704
158	1.34821	1.58949
160	1.35225	1.58466
161	1.35225	1.5683
162	1.35225	1.57334
163	1.32599	1.56971
164	1.33457	1.58231
165	1.35225	1.5886
166	1.35225	1.58097
167	1.35447	1.56887
168	1.3683	1.59093
169	1.374	1.56405
170	1.38073	1.56373
171	1.38931	1.58665
172	1.36912	1.57694
173	1.33912	1.58128
174	1.34821	1.58099
175	1.36992	1.57731
176	1.34821	1.57976
177	1.34821	1.58404
178	1.33912	1.58181
179	1.33912	1.56462
180	1.33912	1.56888
181	1.33053	1.57358
182	1.30377	1.57631
183	1.31286	1.58754
184	1.33912	1.577
185	1.34366	1.57269
186	1.34366	1.57712
187	1.34366	1.5667
188	1.34366	1.57865
189	1.3174	1.58951
190	1.33053	1.5893
191	1.33053	1.59036
192	1.36992	1.57107
193	1.3174	1.56626
194	1.33053	1.58154
195	1.35679	1.57
196	1.36134	1.58743
197	1.33912	1.58462
197	1.34366	1.58181
199	1.33457	1.58439
200	1.34821	1.56513
201	1.35225	1.58623
202	1.35225	1.59001
203	1.35225	1.577
204	1.32599	1.58296
205	1.33457	1.57211
206	1.35225	1.58683
207	1.35225	1.57249
208	1.37447	1.58966
209	1.37851	1.57802
210	1.36134	1.57392
211	1.33912	1.58501
212	1.34366	1.58414
213	1.33457	1.58726
214	1.34821	1.58151
215	1.35225	1.59154
216	1.35225	1.56324
217	1.35225	1.57682
218	1.32599	1.57961
219	1.33912	1.56354
220	1.33912	1.58276
221	1.33912	1.57854
222	1.33053	1.57299
223	1.30377	1.57284
224	1.31286	1.58507
225	1.33912	1.57403
226	1.34366	1.58214
227	1.34366	1.57616
228	1.34366	1.58846
229	1.34366	1.57753
230	1.3174	1.57287
231	1.33053	1.57944
232	1.33053	1.56432
233	1.34366	1.58389
234	1.33457	1.58652
235	1.34821	1.58966
236	1.35225	1.58819
237	1.35225	1.58732
238	1.35225	1.56365
239	1.32599	1.56351
240	1.33457	1.58239
