# Supplementary material for: Swelling Pressure of Double‐Expansive Material and Its Active Support Effect for Coal Seam Gas Drainage Borehole
Source: Hindawi journal article supplement (doi:10.1155/2018/8245036), 2018-01-01
Supplement: f1 [file 8245036.f1.zip › Test No.2 data.xls]

## Sheet: Sheet1
Time/hour	Pr / MPa	Pa / MPa
1	0.0055	0.00504
2	0.0035	0.00503
3	0.0065	0.00501
4	0.0055	0.00504
5	0.00365	0.0053
6	0.02711	0.02484
7	0.00274	0.00231
8	0.0027	0.00251
9	0.02711	0.02484
10	0.02711	0.02484
11	0.03607	0.03715
12	0.04208	0.03855
13	0.04762	0.04237
14	0.05317	0.05031
15	0.05621	0.0515
16	0.05615	0.05074
17	0.05621	0.0515
18	0.0637	0.05836
19	0.06214	0.053
20	0.061	0.0521
21	0.0637	0.05836
22	0.07014	0.07079
23	0.08531	0.07816
24	0.08627	0.07936
25	0.08907	0.08314
26	0.0928	0.08502
27	0.0928	0.08502
28	0.09764	0.09156
29	0.10031	0.09499
30	0.10693	0.09797
31	0.1076	0.10001
32	0.11441	0.10482
33	0.13603	0.12463
34	0.1397	0.1274
35	0.14351	0.13148
36	0.14561	0.1346
37	0.1483	0.13593
38	0.15017	0.13758
39	0.17178	0.15738
40	0.17178	0.15738
41	0.20088	0.18404
42	0.20088	0.18404
43	0.20837	0.1909
44	0.21007	0.1902
45	0.21585	0.19775
46	0.22998	0.2107
47	0.23747	0.21756
48	0.24412	0.22365
49	0.2573	0.23009
50	0.26657	0.24422
51	0.27322	0.25031
52	0.28818	0.26402
53	0.31728	0.29068
54	0.32056	0.29074
55	0.32174	0.31101
56	0.33986	0.39976
57	0.35728	0.29068
58	0.37465	0.34324
59	0.36717	0.33639
60	0.39627	0.36305
61	0.41789	0.38285
62	0.43285	0.39656
63	0.4356	0.40017
64	0.4395	0.40266
65	0.44699	0.40951
66	0.45839	0.42765
67	0.47609	0.43617
68	0.48357	0.44303
69	0.49022	0.44912
70	0.51267	0.46969
71	0.5268	0.48264
72	0.54094	0.49559
73	0.56255	0.51539
74	0.57631	0.51498
75	0.59165	0.54206
76	0.6173	0.55061
77	0.62076	0.56872
78	0.64237	0.58852
79	0.65734	0.60223
80	0.65734	0.60223
81	0.66399	0.60833
82	0.67206	0.61053
83	0.68561	0.62813
84	0.70806	0.6487
85	0.71471	0.65479
86	0.74381	0.68145
87	0.75794	0.6944
88	0.77291	0.70811
89	0.78031	0.71526
90	0.78704	0.72106
91	0.80201	0.73477
92	0.82362	0.75458
93	0.83776	0.76753
94	0.84524	0.77438
95	0.86686	0.79419
96	0.87434	0.80104
97	0.90344	0.8277
98	0.90344	0.8277
99	0.90344	0.8277
100	0.90344	0.8277
101	0.91758	0.84065
102	0.9284	0.8317
103	0.95333	0.87341
104	0.96081	0.88026
105	0.98243	0.90007
106	1.00404	0.91987
107	1.01153	0.92673
108	1.01901	0.93358
109	1.02566	0.93968
110	1.02566	0.93968
111	1.03314	0.94653
112	1.03314	0.94653
113	1.06973	0.98005
114	1.06973	0.98005
115	1.06973	0.98005
116	1.07638	0.98614
116	1.11296	1.01966
118	1.1271	1.03261
119	1.1271	1.03261
120	1.13458	1.03946
121	1.1562	1.05927
122	1.1767	1.084
123	1.19278	1.09279
124	1.1853	1.08593
125	1.19943	1.09888
126	1.22105	1.11868
127	1.2435	1.13925
128	1.2673	1.1576
129	1.28673	1.17886
130	1.3007	1.2079
131	1.32248	1.21162
132	1.3441	1.23142
133	1.35158	1.23828
134	1.35158	1.23828
135	1.35907	1.24513
136	1.3708	1.2521
137	1.38068	1.26494
138	1.3976	1.2755
139	1.4023	1.28474
140	1.41002	1.29073
141	1.41643	1.29769
142	1.42316	1.30078
143	1.4314	1.3114
144	1.43888	1.31826
145	1.4576	1.3219
146	1.46715	1.34416
147	1.46835	1.35867
148	1.47463	1.35101
149	1.48877	1.36396
150	1.4974	1.3702
151	1.50373	1.37767
152	1.51122	1.38453
153	1.52792	1.38746
154	1.53476	1.40715
155	1.53996	1.41069
156	1.54697	1.41728
157	1.55445	1.42414
158	1.55445	1.42414
159	1.56074	1.43051
160	1.56507	1.43765
161	1.56967	1.44002
162	1.57607	1.44394
163	1.58031	1.44972
164	1.58647	1.45063
165	1.5902	1.45689
166	1.5902	1.45873
167	1.5902	1.45997
168	1.5918	1.46032
169	1.6042	1.46538
170	1.613	1.46982
171	1.60517	1.4706
172	1.60517	1.4706
173	1.61182	1.4767
174	1.61182	1.4767
175	1.62679	1.49041
176	1.62679	1.49041
177	1.57607	1.44394
178	1.60517	1.4706
179	1.6193	1.48355
180	1.6193	1.48355
181	1.6193	1.48355
182	1.6193	1.48355
183	1.61182	1.4767
184	1.61182	1.4767
185	1.61182	1.4767
186	1.61182	1.4767
187	1.61182	1.4767
188	1.61182	1.4767
189	1.61182	1.4767
190	1.61182	1.4767
191	1.61182	1.4767
192	1.6193	1.48355
193	1.62679	1.49041
194	1.62679	1.49041
195	1.62679	1.49041
196	1.6193	1.48355
197	1.61182	1.4767
198	1.61182	1.4767
199	1.6193	1.48355
200	1.6193	1.48355
201	1.63427	1.49726
202	1.64092	1.50336
203	1.64092	1.50336
204	1.64092	1.50336
205	1.64092	1.50336
206	1.64092	1.50336
207	1.64092	1.50336
208	1.64092	1.50336
209	1.64092	1.50336
210	1.64092	1.50336
211	1.64092	1.50336
212	1.63427	1.49726
213	1.6484	1.51021
214	1.6484	1.51021
215	1.6484	1.51021
216	1.6484	1.51021
217	1.6484	1.51021
218	1.6484	1.51021
219	1.6484	1.51021
220	1.6484	1.51021
221	1.6484	1.51021
222	1.65589	1.51707
223	1.65589	1.51707
224	1.67002	1.53002
225	1.67002	1.53002
226	1.65589	1.51707
227	1.66254	1.52316
228	1.66254	1.52316
229	1.67002	1.53002
230	1.67002	1.53002
231	1.67002	1.53002
232	1.67002	1.53002
233	1.6775	1.53687
234	1.6775	1.53687
235	1.6775	1.53687
236	1.6775	1.53687
237	1.6775	1.53687
238	1.6775	1.53687
239	1.67002	1.53002
240	1.67002	1.53002
