# Supplementary material for: Swelling Pressure of Double‐Expansive Material and Its Active Support Effect for Coal Seam Gas Drainage Borehole
Source: Hindawi journal article supplement (doi:10.1155/2018/8245036), 2018-01-01
Supplement: f1 [file 8245036.f1.zip › Test No.3 data.xls]

## Sheet: Sheet1
Time / hour	Pr / MPa	Pa / MPa
1	0.0021	0.0081
2	0.03028	0.0062
3	0.02972	0.0071
4	0.03104	0.00732
5	0.03028	0.0086
6	0.03207	0.09248
7	0.03574	0.1032
8	0.03682	0.1276
9	0.03787	0.1386
10	0.05314	0.14634
11	0.06275	0.17748
12	0.06108	0.1921
13	0.05391	0.20862
14	0.08004	0.2136
15	0.08976	0.22377
16	0.09272	0.2365
17	0.09264	0.25491
18	0.09506	0.27847
19	0.09981	0.2861
20	0.1079	0.2936
21	0.10635	0.30119
22	0.1076	0.32476
23	0.1079	0.3362
24	0.17435	0.34832
25	0.17793	0.3571
26	0.1896	0.36347
27	0.1974	0.3762
28	0.21675	0.45604
29	0.2376	0.3879
30	0.2603	0.39461
31	0.27159	0.4162
32	0.3054	0.4237
33	0.33318	0.44089
34	0.3472	0.4432
35	0.3586	0.4498
36	0.6976	0.45079
37	0.37959	0.45213
38	0.43443	0.4327
39	0.4608	0.45604
40	0.48843	0.4782
41	0.50091	0.49476
42	0.52724	0.4367
43	0.5609	0.42575
44	0.57365	0.4638
45	0.5973	0.47961
46	0.61246	0.4765
47	0.6483	0.4907
48	0.6749	0.51832
49	0.73733	0.52208
50	0.7674	0.53756
51	0.7832	0.54097
52	0.7653	0.54946
53	0.79133	0.60825
54	0.796	0.60736
55	0.8265	0.61074
56	0.8873	0.61931
57	0.90777	0.63256
58	0.96261	0.65198
59	0.9976	0.66773
60	0.86136	0.67061
61	1.06301	0.68074
62	1.11786	0.69085
63	1.155	0.70325
64	1.16426	0.71338
65	1.174	0.72787
66	1.18789	0.74534
67	1.2007	0.75101
68	1.21032	0.76009
69	1.21067	0.77043
70	1.21746	0.77416
71	1.2265	0.78991
72	1.22973	0.81017
73	1.23067	0.81287
74	1.23429	0.83051
75	1.25078	0.84176
76	1.26551	0.85131
77	1.27036	0.85916
78	1.2789	0.86967
79	1.2834	0.88023
80	1.28829	0.90103
81	1.29007	0.89787
82	1.29572	0.93072
83	1.3068	0.97086
84	1.30986	1.03
85	1.31596	0.99769
86	1.3271	0.96772
87	1.3296	0.97203
88	1.3369	1.0603
89	1.3374	1.08732
90	1.3468	1.10743
91	1.3492	1.13772
92	1.35073	0.99045
93	1.36017	1.17635
94	1.3673	1.20757
95	1.3625	1.22368
96	1.38954	1.24219
97	1.3976	1.25333
98	1.4021	1.26228
99	1.4151	1.30856
100	1.42076	1.30793
101	1.4277	1.30818
102	1.4306	1.30829
103	1.4365	1.31726
104	1.4399	1.30856
105	1.4473	1.31096
106	1.45957	1.32154
107	1.4834	1.33013
108	1.48964	1.32371
109	1.51357	1.32765
110	1.52007	1.34796
111	1.5398	1.34689
112	1.54073	1.35485
113	1.54479	1.36789
114	1.5496	1.37045
115	1.55072	1.38132
116	1.55482	1.38599
117	1.56073	1.38951
118	1.57136	1.37025
119	1.57601	1.38599
120	1.58741	1.39708
121	1.59017	1.40561
122	1.6032	1.42716
123	1.6073	1.4301
124	1.61532	1.4247
125	1.61482	1.45681
126	1.6179	1.46537
127	1.6274	1.47856
128	1.63158	1.47
129	1.6376	1.47099
130	1.6573	1.47532
131	1.66122	1.48036
132	1.6795	1.49501
133	1.6847	1.4999
134	1.69244	1.5097
135	1.70324	1.51654
136	1.70763	1.53327
137	1.71658	1.53076
138	1.7	1.53873
139	1.73125	1.54084
140	1.7463	1.55687
141	1.7532	1.56249
142	1.76247	1.57
143	1.7943	1.57955
144	1.8169	1.58021
145	1.82407	1.58346
146	1.8367	1.601
147	1.8543	1.58713
148	1.8632	1.673
149	1.87002	1.5947
150	1.87131	1.605
151	1.8795	1.58713
152	1.876	1.673
153	1.8832	1.61827
154	1.8865	1.58713
155	1.8896	1.673
156	1.8975	1.62584
157	1.9032	1.62763
158	1.9109	1.63001
159	1.91772	1.6342
160	1.9207	1.63341
161	1.9279	1.63241
162	1.9386	1.63897
163	1.9406	1.6402
164	1.94894	1.64117
165	1.9479	1.643
166	1.9586	1.6478
167	1.9603	1.6494
168	1.9701	1.6552
169	1.97172	1.6679
170	1.9803	1.67213
171	1.9972	1.67206
172	1.99534	1.67213
173	1.99432	1.67205
174	1.9986	1.67214
175	2.01812	1.67213
176	2.01839	1.679
177	2.02368	1.6832
178	2.00796	1.69569
179	2.01654	1.70065
180	2.01812	1.7154
181	2.01973	1.71926
182	2.02397	1.7234
183	2.02471	1.7296
184	2.02656	1.7341
185	2.02976	1.7399
186	2.03416	1.74198
187	2.03654	1.7536
188	2.03989	1.7683
189	2.041	1.77312
190	2.01769	1.77226
191	2.04934	1.78096
192	2.05037	1.7963
193	2.05274	1.8094
194	2.05327	1.78069
195	2.05694	1.8265
196	2.05996	1.7934
197	2.06079	1.78069
198	2.06274	1.7823
199	2.05697	1.7675
200	2.07297	1.80431
201	2.07436	1.82509
202	2.07196	1.83822
203	2.07682	1.80139
204	2.07297	1.80451
205	2.0896	1.80142
206	2.10327	1.80551
207	2.09772	1.8153
208	2.09986	1.82378
209	2.08815	1.84304
210	2.12732	1.81354
211	2.11043	1.83017
212	2.11964	1.80121
213	2.08815	1.82052
214	2.15213	1.84909
215	2.0896	1.8375
216	2.10327	1.80464
217	2.09772	1.84332
218	2.09986	1.83902
219	2.08815	1.82897
220	2.12732	1.84274
221	2.10419	1.82312
222	2.09986	1.82085
223	2.08815	1.80471
224	2.12732	1.80089
225	2.10419	1.83271
226	2.0896	1.80739
227	2.10327	1.82621
228	2.09772	1.84177
229	2.09986	1.83529
230	2.08815	1.84986
231	2.12732	1.84197
232	2.09986	1.82361
233	2.08815	1.80668
234	2.12732	1.84202
235	2.10419	1.84323
236	2.09986	1.81157
237	2.08815	1.80507
238	2.12732	1.8316
239	2.10419	1.83544
240	2.09774	1.81306
