# Supplementary material for: Swelling Pressure of Double‐Expansive Material and Its Active Support Effect for Coal Seam Gas Drainage Borehole
Source: Hindawi journal article supplement (doi:10.1155/2018/8245036), 2018-01-01
Supplement: f1 [file 8245036.f1.zip › Test No.4 data.xls]

## Sheet: Sheet1
0	0	0
1	0.00243	0.00212
2	0.00244	0.00232
3	0.0227	0.0273
4	0.02155	0.02052
5	0.05315	0.05063
6	0.09799	0.09333
7	0.05315	0.05063
8	0.14283	0.13604
9	0.04727	0.04503
10	0.05315	0.05063
11	0.04066	0.03872
12	0.05732	0.05107
13	0.06984	0.06321
14	0.0855	0.08143
15	0.11122	0.10593
16	0.12327	0.12074
17	0.14283	0.13604
18	0.16856	0.16054
19	0.18767	0.17874
20	0.22001	0.20955
21	0.23912	0.22775
22	0.27073	0.25786
23	0.26461	0.29963
24	0.32218	0.30686
25	0.34736	0.32051
26	0.35379	0.33697
27	0.39863	0.37967
28	0.40524	0.38597
29	0.44765	0.42874
30	0.4567	0.43498
31	0.53976	0.51409
32	0.55887	0.5323
33	0.56548	0.5386
34	0.59048	0.5624
35	0.6162	0.5869
36	0.64193	0.61141
37	0.66104	0.62961
38	0.68677	0.65411
39	0.70588	0.67232
40	0.71249	0.67862
41	0.7364	0.69721
42	0.7441	0.70872
43	0.76321	0.72692
44	0.78894	0.75143
45	0.82128	0.78223
46	0.84701	0.80673
47	0.87862	0.83684
48	0.9003	0.86397
49	0.93007	0.88585
50	0.9874	0.94045
51	1.06385	1.01326
52	1.10281	1.05037
53	1.11237	1.1074
54	1.1153	1.06227
55	1.14764	1.09308
56	1.17264	1.11688
57	1.19175	1.13508
58	1.21747	1.15958
59	1.26893	1.20859
60	1.30054	1.2387
61	1.32038	1.2576
62	1.3742	1.2658
63	1.3586	1.294
64	1.37772	1.31221
65	1.40344	1.33671
66	1.4396	1.3742
67	1.46739	1.39762
68	1.50561	1.43402
69	1.53134	1.45853
70	1.5496	1.46793
71	1.55045	1.47673
72	1.58206	1.50683
73	1.58973	1.51426
74	1.59529	1.51944
75	1.6269	1.54954
76	1.64601	1.56774
77	1.69746	1.61675
78	1.70673	1.62074
79	1.71365	1.52973
80	1.71657	1.63495
81	1.78052	1.69586
82	1.78714	1.70216
83	1.80732	1.71309
84	1.80625	1.72036
85	1.81074	1.72996
86	1.82536	1.73857
87	1.8577	1.76937
88	1.8577	1.76937
89	1.86358	1.77497
90	1.86732	1.77649
91	1.86549	1.77932
92	1.86358	1.77497
93	1.8702	1.78127
94	1.8702	1.78127
95	1.86358	1.77497
96	1.86358	1.77497
97	1.87017	1.77943
98	1.87935	1.78537
99	1.88526	1.75647
100	1.88931	1.79948
101	1.89593	1.80578
102	1.93415	1.84218
103	1.95988	1.86669
104	1.97237	1.87859
105	1.9856	1.89119
106	1.9856	1.89119
107	1.99709	1.89632
108	2.00471	1.90939
109	2.01133	1.91569
110	2.02383	1.92759
111	2.02383	1.92759
112	2.04294	1.9458
113	2.0531	1.6576
114	2.06205	1.964
115	2.06866	1.9703
116	2.06871	1.98001
117	2.06866	1.9703
118	2.07254	1.99032
119	2.08778	1.9885
120	2.08778	1.9885
121	2.10027	2.0004
122	2.1135	2.01301
123	2.1135	2.01301
124	2.12765	2.02773
125	2.13261	2.03121
126	2.15834	2.05571
127	2.16422	2.06131
128	2.17084	2.06761
129	2.18995	2.08582
130	2.19763	2.08632
131	2.20732	2.09621
132	2.19656	2.09212
133	2.2414	2.13482
134	2.23479	2.12852
135	2.19656	2.09212
136	2.21567	2.11032
137	2.23479	2.12852
138	2.23479	2.12852
139	2.20832	2.10331
140	2.22795	2.12201
141	2.2214	2.11578
142	2.22795	2.12201
143	2.2025	2.09777
144	2.17706	2.07354
145	2.17051	2.06731
146	2.17051	2.06731
147	2.17706	2.07354
148	2.19596	2.09154
149	2.22795	2.12201
150	2.2214	2.11578
151	2.22795	2.12201
152	2.2025	2.09777
153	2.17706	2.07354
154	2.17051	2.06731
155	2.17051	2.06731
156	2.17706	2.07354
157	2.19596	2.09154
158	2.1836	2.07977
159	2.1836	2.07977
160	2.1836	2.07977
161	2.1836	2.07977
162	2.1836	2.07977
163	2.1836	2.07977
164	2.18942	2.08531
165	2.18942	2.08531
166	2.17706	2.07354
167	2.17051	2.06731
168	2.1647	2.06177
169	2.17706	2.07354
170	2.1836	2.07977
171	2.2025	2.09777
172	2.21486	2.10955
173	2.23376	2.12755
174	2.24685	2.14001
175	2.25921	2.15178
176	2.25921	2.15178
177	2.25921	2.15178
178	2.24685	2.14001
179	2.24031	2.13378
180	2.2214	2.11578
181	2.20832	2.10331
182	2.2025	2.09777
183	2.1836	2.07977
184	2.15815	2.05554
185	2.19596	2.09154
186	2.20832	2.10331
187	2.21486	2.10955
188	2.20832	2.10331
189	2.19596	2.09154
190	2.19596	2.09154
191	2.1836	2.07977
192	2.17706	2.07354
193	2.17706	2.07354
194	2.1836	2.07977
195	2.18942	2.08531
196	2.18942	2.08531
197	2.18942	2.08531
198	2.18942	2.08531
199	2.1647	2.06177
200	2.17706	2.07354
201	2.1836	2.07977
202	2.18942	2.08531
203	2.18942	2.08531
204	2.18942	2.08531
205	2.18942	2.08531
206	2.18942	2.08531
207	2.19596	2.09154
208	2.19596	2.09154
209	2.19596	2.09154
210	2.19596	2.09154
211	2.1836	2.07977
212	2.2025	2.09777
213	2.19596	2.09154
214	2.18942	2.08531
215	2.2214	2.11578
216	2.2214	2.11578
217	2.22795	2.12201
218	2.1836	2.07977
219	2.17051	2.06731
220	2.17051	2.06731
221	2.1836	2.07977
222	2.1836	2.07977
223	2.1836	2.07977
224	2.18942	2.08531
225	2.19596	2.09154
226	2.19596	2.09154
227	2.19596	2.09154
228	2.19596	2.09154
229	2.1836	2.07977
230	2.2025	2.09777
231	2.19596	2.09154
232	2.18942	2.08531
233	2.2214	2.11578
234	2.2214	2.11578
235	2.22795	2.12201
236	2.1836	2.07977
237	2.25921	2.15178
238	2.25921	2.15178
239	2.25921	2.15178
240	2.24685	2.14001
