# Supplementary figures and images for: Swelling Pressure of Double‐Expansive Material and Its Active Support Effect for Coal Seam Gas Drainage Borehole
Source: Hindawi journal article supplement (doi:10.1155/2018/8245036), 2018-01-01

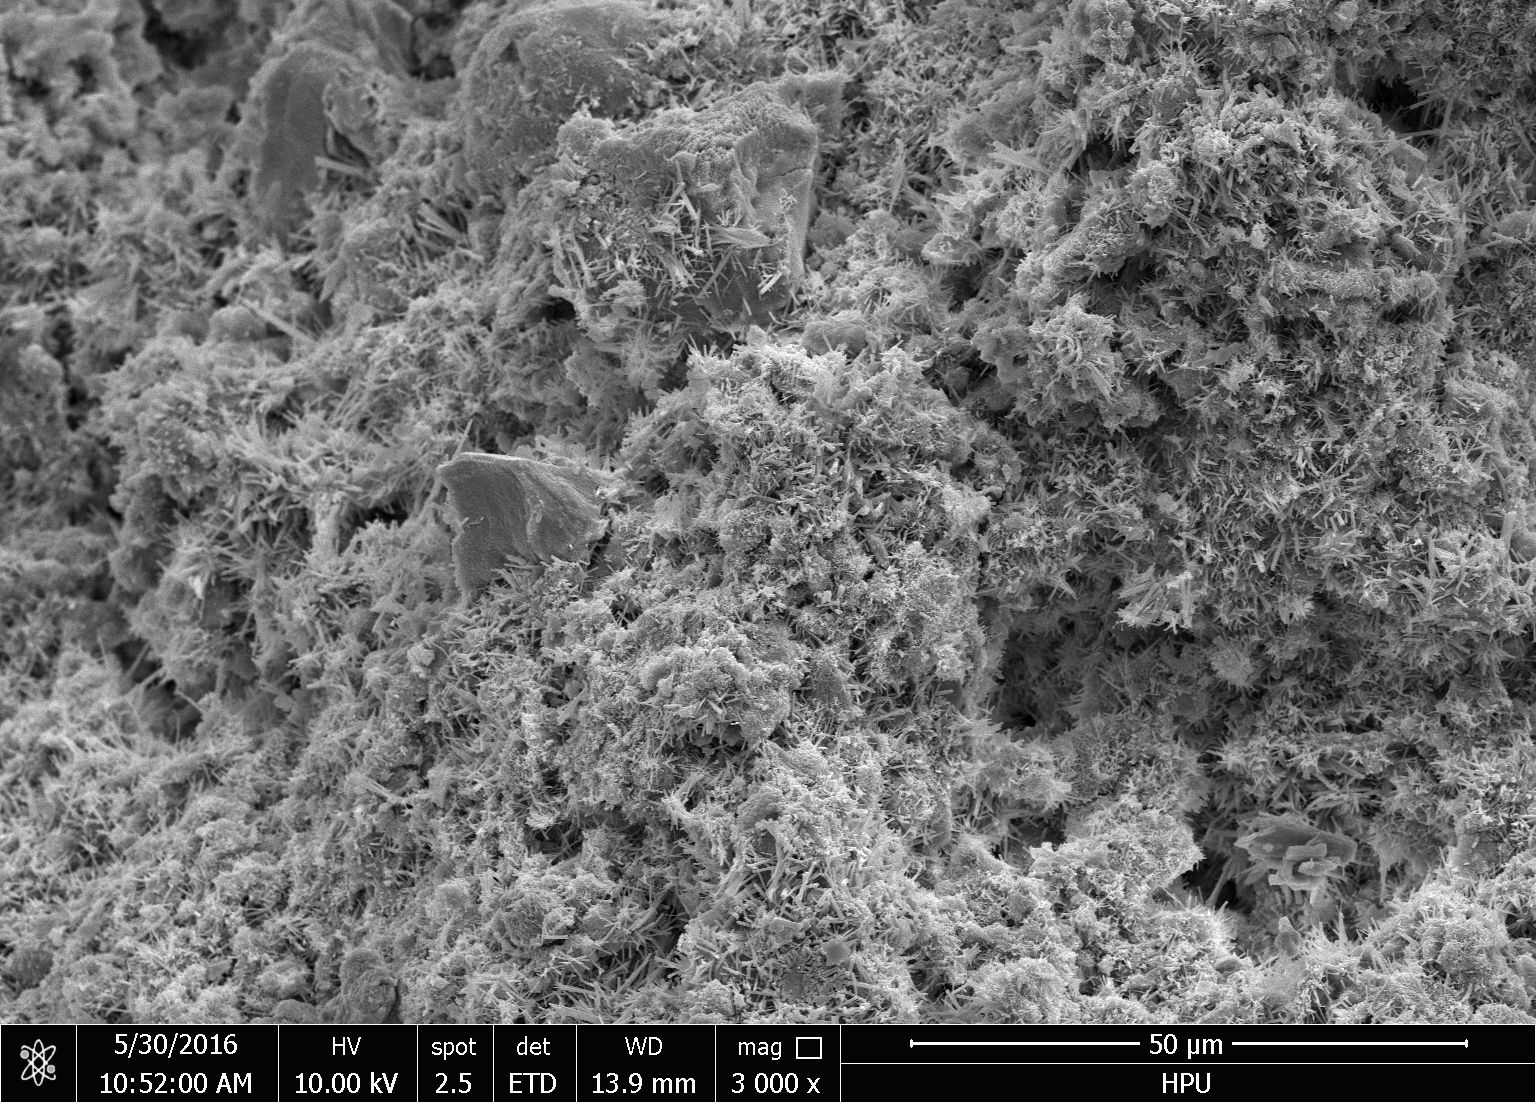

Supplement: f1 [file 8245036.f1.zip › Micrograph at the 168th hour after the starting hydration.jpg]

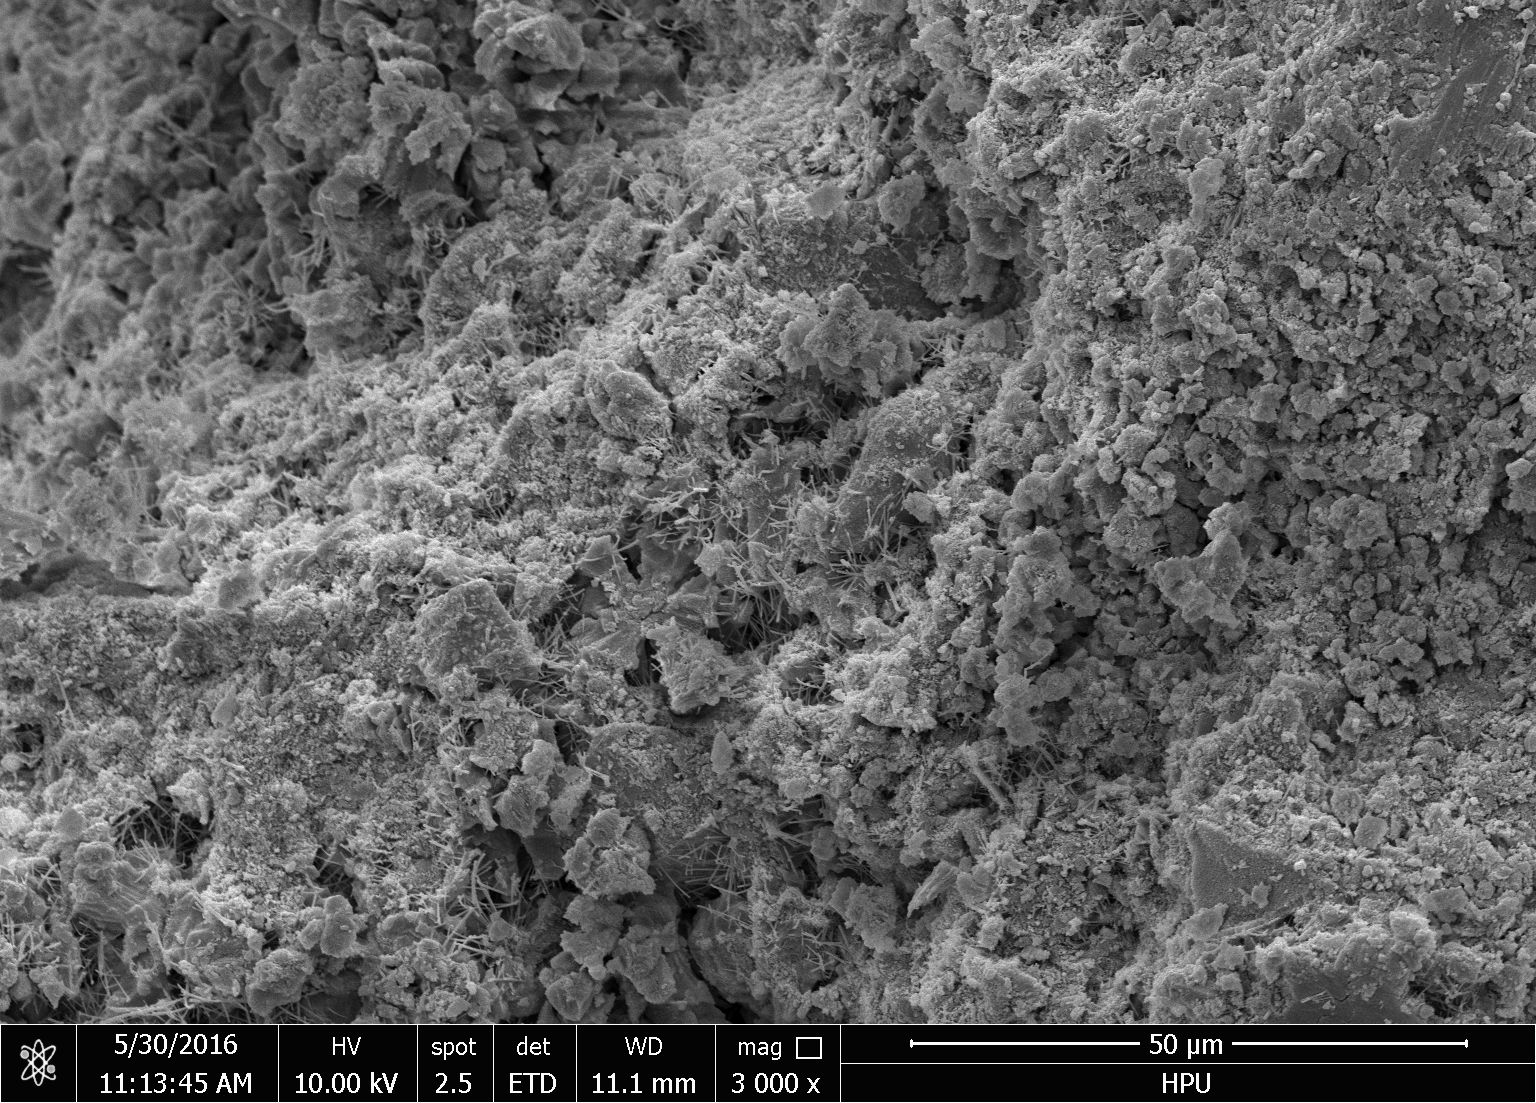

Supplement: f1 [file 8245036.f1.zip › Micrograph at the 16th hour after the starting hydration.jpg]
